# Supplementary material
Source: PubMed Central journal article supplement (PMC2772109)

# The Sponge-Derived Fijianolide Polyketide Class: Further Evaluation of Their Structural and Cytotoxicity Properties

Tyler A. Johnson,<sup>†</sup> Karen Tenney,<sup>†</sup> Robert H. Cichewicz,<sup>†</sup> Brandon I. Morinaka,<sup>†</sup> Kimberly N. White,<sup>†</sup> Taro Amagata,<sup>†</sup> Balanehru Subramanian,<sup>§</sup> Joseph Media,<sup>§</sup> Susan L. Mooberry,<sup>‡</sup> Frederick A. Valeriote<sup>§</sup> and Phillip Crews.<sup>\*,†</sup>

## [Supporting Information]

*Department of Chemistry and Biochemistry and Institute for Marine Sciences, University of California, Santa Cruz, California 95064, Josephine Ford Cancer Center, Henry Ford Health System, Detroit, Michigan 48202, and Southwest Foundation for Biomedical Research, San Antonio, Texas 78245*

### [Contents]

**Chart S1.** Isolation scheme

**Table S1.** Summary of *Cacospongia mycofijiensis* type natural products studied by others

**Table S2.** <sup>1</sup>H and <sup>13</sup>C NMR data of **1** in C<sub>6</sub>D<sub>6</sub>.

**Table S3.** <sup>1</sup>H and <sup>13</sup>C NMR data of **2** in C<sub>6</sub>D<sub>6</sub>

**Table S4.** <sup>1</sup>H, <sup>13</sup>C, COSY and HMBC NMR data of **7** in C<sub>6</sub>D<sub>6</sub> and CDCl<sub>3</sub>

**Table S5.** <sup>1</sup>H and <sup>13</sup>C NMR data of **8** in C<sub>6</sub>D<sub>6</sub>

**Table S6.** <sup>1</sup>H, <sup>13</sup>C, COSY and HMBC NMR data of **9** in C<sub>6</sub>D<sub>6</sub> and acetone *d*<sub>6</sub>

**Table S7.** <sup>1</sup>H, <sup>13</sup>C, COSY and HMBC NMR data of **10** in C<sub>6</sub>D<sub>6</sub>

**Table S8.** <sup>1</sup>H, <sup>13</sup>C, and COSY NMR data of **11** in C<sub>6</sub>D<sub>6</sub>

**Table S9.** <sup>1</sup>H, <sup>13</sup>C, and COSY NMR data of **12** in C<sub>6</sub>D<sub>6</sub>

**Table S10.** NOE Enhancements observed for H-23, H-26 and H-27 of Fijianolide G (**10**) in C<sub>6</sub>D<sub>6</sub>

**Table S11.** Cytotoxicity in zone units of the fijianolides from the disk diffusion soft agar colony formation assay

**Figure S1.** Selected examples of cytotoxic marine-derived polyketides

**Figure S2.** <sup>1</sup>H NMR spectrum of Fijianolide A (**1**), (500 MHz, C<sub>6</sub>D<sub>6</sub>)

**Figure S3.** <sup>13</sup>C NMR spectrum of Fijianolide A (**1**), (125 MHz, C<sub>6</sub>D<sub>6</sub>)

**Figure S4.** <sup>1</sup>H NMR spectrum of Fijianolide B (**2**), (500 MHz, C<sub>6</sub>D<sub>6</sub>)

**Figure S5.** <sup>13</sup>C NMR spectrum of Fijianolide B (**2**), (125 MHz, C<sub>6</sub>D<sub>6</sub>)

**Figure S6.** <sup>1</sup>H NMR spectrum of Fijianolide D (**7**), (500 MHz, CDCl<sub>3</sub>)

**Figure S7.** <sup>13</sup>C NMR spectrum of Fijianolide D (**7**), (125 MHz, C<sub>6</sub>D<sub>6</sub>)

**Figure S8.** <sup>1</sup>H NMR spectrum of Fijianolide E (**8**), (500 MHz, C<sub>6</sub>D<sub>6</sub>)

**Figure S9.** <sup>13</sup>C NMR spectrum of Fijianolide E (**8**), (125 MHz, C<sub>6</sub>D<sub>6</sub>)

**Figure S10.** <sup>1</sup>H NMR spectrum of Fijianolide F (**9**), (500 MHz, C<sub>6</sub>D<sub>6</sub>)

**Figure S11.** <sup>13</sup>C NMR spectrum of Fijianolide F (**9**), (125 MHz, C<sub>6</sub>D<sub>6</sub>)

**Figure S12.** <sup>1</sup>H NMR spectrum of Fijianolide G (**10**), (500 MHz, C<sub>6</sub>D<sub>6</sub>)

**Figure S13.** <sup>13</sup>C NMR spectrum of Fijianolide G (**10**), (125 MHz, C<sub>6</sub>D<sub>6</sub>)

**Figure S14.** <sup>1</sup>H NMR spectrum of Fijianolide H (**11**), (500 MHz, C<sub>6</sub>D<sub>6</sub>)

**Figure S15.** <sup>13</sup>C NMR spectrum of Fijianolide H (**11**), (125 MHz, C<sub>6</sub>D<sub>6</sub>)

**Figure S16.** <sup>1</sup>H NMR spectrum of Fijianolide I (**12**), (500 MHz, C<sub>6</sub>D<sub>6</sub>)

**Figure S17.** <sup>13</sup>C NMR spectrum of Fijianolide I (**12**), (125 MHz, C<sub>6</sub>D<sub>6</sub>)

**Figure S18.** NOE enhancement of H-23 of **9** in benzene-*d*<sub>6</sub> at 600 MHz

**Figure S19.** NOE enhancement of H-26 of **9** in benzene-*d*<sub>6</sub> at 600 MHz

**Figure S20.** NOE enhancement of H-27 of **9** in benzene-*d*<sub>6</sub> at 600 MHz

**Figure S21.** NOE enhancement of H-30 of **9** in benzene-*d*<sub>6</sub> at 600 MHz

**Figure S22.** NOE enhancement of H-23 of **10** in benzene-*d*<sub>6</sub> at 600 MHz

**Figure S23.** NOE enhancement of H-26 of **10** in benzene-*d*<sub>6</sub> at 600 MHz

**Figure S24.** NOE enhancement of H-27 of **10** in benzene-*d*<sub>6</sub> at 600 MHz

**Figure S25.** Gradient LCMS chromatogram of **1** using: 30:70 to 80:20 (50min) in CH<sub>3</sub>CN/H<sub>2</sub>O.  
**Figure S26.** Gradient LCMS chromatogram of **2** using: 30:70 to 80:20 (50min) in CH<sub>3</sub>CN/H<sub>2</sub>O.  
**Figure S27.** Gradient LCMS chromatogram of **7** using: 30:70 to 80:20 (50min) in CH<sub>3</sub>CN/H<sub>2</sub>O.  
**Figure S28.** Gradient LCMS chromatogram of **8** using: 10:90 to 100 (50min) in CH<sub>3</sub>CN/H<sub>2</sub>O.  
**Figure S29.** Gradient LCMS chromatogram of **9** using: 30:70 to 80:20 (50min) in CH<sub>3</sub>CN/H<sub>2</sub>O.  
**Figure S30.** Gradient LCMS chromatogram of **10** using: 30:70 to 80:20 (50min) in CH<sub>3</sub>CN/H<sub>2</sub>O.  
**Figure S31.** Gradient LCMS chromatogram of **11** using: 30:70 to 80:20 (50min) in CH<sub>3</sub>CN/H<sub>2</sub>O.  
**Figure S32.** Gradient LCMS chromatogram of **12** using: 30:70 to 80:20 (50min) in CH<sub>3</sub>CN/H<sub>2</sub>O.

**Chart S1.** Isolation of the fijianolides, latrunculin A and mycothiazole

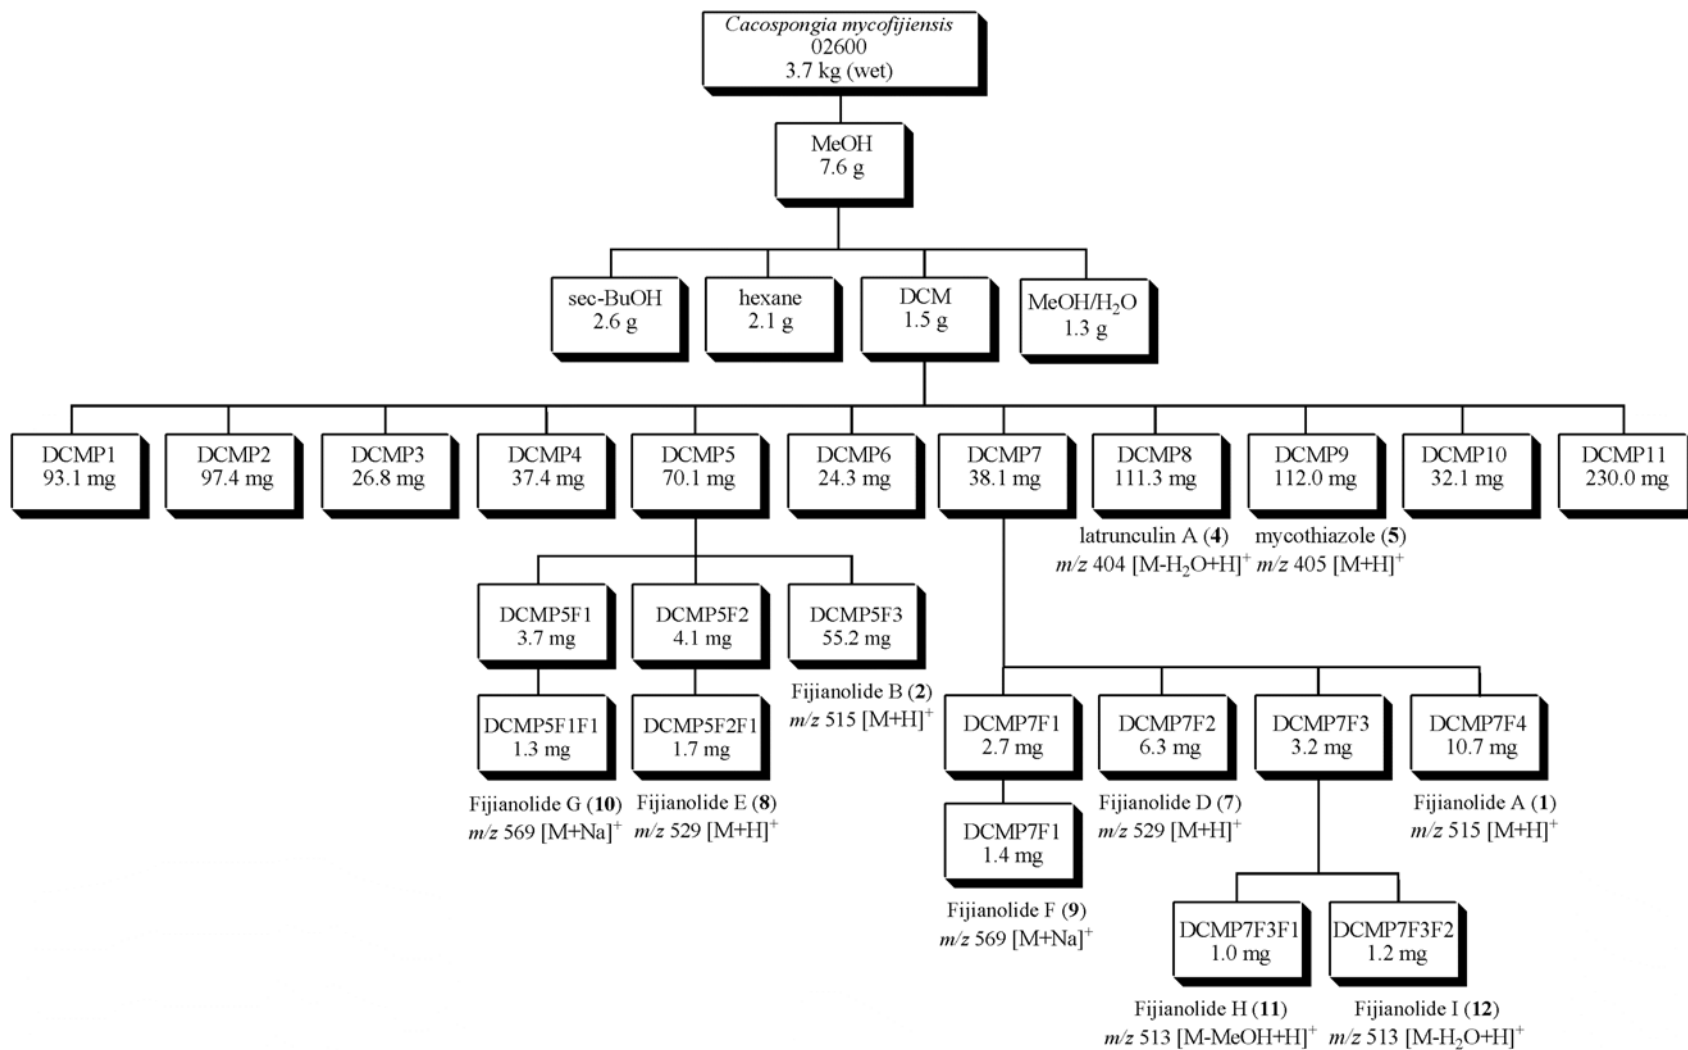

**Table S1.** Summary of *Cacospongia mycofijiensis* Type Natural Products Studied by Others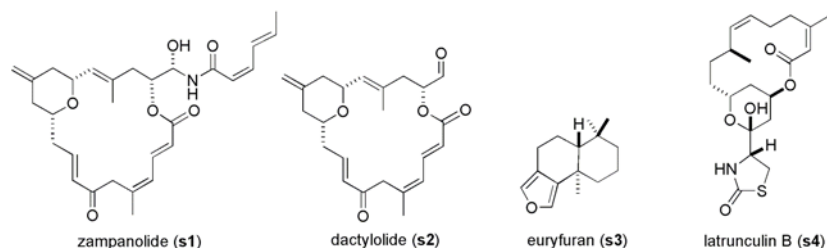

| Entry number | Taxonomic identification                             | Collection Site  | Major Constituents    |
|--------------|------------------------------------------------------|------------------|-----------------------|
| 1            | <i>unidentifiable</i> (Bergquist) <sup>a</sup>       | American Samoa   | <b>1, 4, s3</b>       |
| 2            | <i>Negombata magnifica</i> <sup>b, c</sup>           | Djibouti         | <b>4, s4</b>          |
| 3            | <i>N. magnifica</i> <sup>d</sup>                     | Egypt            | <b>4</b>              |
| 4            | <i>Hyatella</i> sp. (Bergquist) <sup>e</sup>         | Indonesia        | <b>1, 2, 4</b>        |
| 5            | <i>N. magnifica</i> <sup>d</sup>                     | Israel           | <b>s4</b>             |
| 6            | <i>Fasciospongia rimosa</i> (Hooper) <sup>f, g</sup> | Japan            | <b>1, 2, s1, 3, 4</b> |
| 7            | <i>Cacospongia mycofijiensis</i> <sup>h</sup>        | Marshall Islands | <b>1, 2, 4</b>        |
| 8            | <i>N. magnifica</i> <sup>c</sup>                     | Saudi Arabia     | <b>4</b>              |
| 9            | <i>N. magnifica</i> <sup>c</sup>                     | Saudi Arabia     | <b>s4</b>             |
| 10           | <i>Dactylospongia</i> sp. (Hooper) <sup>i</sup>      | Vanuatu          | <b>1, 2, s2, 4, 5</b> |

<sup>a</sup> Gulavita, N. L.; Gunasekera, S. P. and Pomponi, S. A. *J. Nat. Prod.* **1992**, 55, 4, 506-508. <sup>b</sup> Previously known as *Latrunculia magnifica*. <sup>c</sup> Ilan, M. *Biol. Bull.* **1995**, 188: 306-312. <sup>d</sup> Groweiss, A.; Shmeuli, U. Kashman, Y. Marine Toxins of *Latrunculia magnifica*. *J. Org. Chem.* **1983**, 48, 3512-3516. <sup>e</sup> Corley, D. G., Herb, R.; Moore, R. E.; Scheuer, P. J. *J. Org. Chem.* **1988**, 53, 3644-6. <sup>f</sup> Tanaka, J.; Higa, T.; Bernardineli, G.; Jefford, C. *Chemistry. Lett.* **1996**, 255. <sup>g</sup> Tanaka J., Higa, T. *Tetrahedron Lett.* **1996**, 37, 5535-5538. <sup>h</sup> Mooberry, S. L.; Tien, G.; Hernandez, A. H.; Plubrukarn, A.; Davidson, B. *Cancer Research* **1999**, 59, 653-660. <sup>i</sup> Cutignano, A.; Bruno, I.; Bifulco, G.; Casapullo, A.; Debitus, C.; Gomez-Paloma, L.; Riccio, R. *Eur. J. Org. Chem.* **2001**, 775-778.

**Table S2.**  $^1\text{H}$  and  $^{13}\text{C}$  NMR<sup>a</sup> data of **1** in  $\text{C}_6\text{D}_6$ 

| position | $\delta_{\text{H}}$ (J in HZ)   | $\delta_{\text{C}}$ | C mult.         |
|----------|---------------------------------|---------------------|-----------------|
| 1        |                                 | 165.6               | C               |
| 2        | 5.80 d (12.0)                   | 123.7               | CH              |
| 3        | 5.71 ddd (11.4, 9.6, 6.0)       | 142.2               | CH              |
| 4a       | 3.08 ddd (15.9, 10.8, 4.8)      | 36.1                | CH <sub>2</sub> |
| 4b       | 2.28 m                          |                     |                 |
| 5        | 4.37 dddd (10.2, 7.2, 4.8, 3.0) | 73.2                | CH              |
| 6        | 5.56 ddt (10.2, 2.4, 1.2)       | 128.9               | CH              |
| 7        | 5.65 m                          | 125.4               | CH              |
| 8a       | 1.81 dd (15.0, 9.6)             | 32.1                | CH <sub>2</sub> |
| 8b       | 1.61 m                          |                     |                 |
| 9        | 3.64 tt (12.2, 2.4)             | 66.7                | CH              |
| 10a      | 1.51 ddd (13.8, 9.6, 1.8)       | 43.0                | CH <sub>2</sub> |
| 10b      | 0.93 ddd (13.8, 9.0, 1.8)       |                     |                 |
| 11       | 1.93 ddd (14.4, 7.8, 6.6)       | 27.4                | CH              |
| 12a      | 2.19 m                          | 46.0                | CH <sub>2</sub> |
| 12b      | 2.03 m                          |                     |                 |
| 13       |                                 | 146.1               | C               |
| 14       | 2.23 dd (15.6, 10.2)            | 35.8                | CH <sub>2</sub> |
| 15       | 4.15 ddd (6.6, 4.2, 1.2)        | 71.5                | CH              |
| 16       | 4.11 dd (4.8, 1.8)              | 75.5                | CH              |
| 17       | 4.47 ddd (10.2, 5.4, 4.8)       | 78.3                | CH              |
| 18       | 2.13 ddd (13.8, 7.8, 1.8)       | 35.2                | CH <sub>2</sub> |
| 19       | 5.70 ddd (3.9, 3.6, 1.2)        | 77.0                | CH              |
| 20       | 4.45 dd (6.0, 5.4)              | 82.0                | CH              |
| 21       | 5.91 ddd (15.6, 6.0, 1.8)       | 126.0               | CH              |
| 22       | 6.06 ddd (15.6, 5.4, 1.8)       | 134.0               | CH              |
| 23       | 3.93 dddd (11.4, 5.4, 4.8, 0.6) | 73.5                | CH              |
| 24a      | 2.01 m                          | 36.1                | CH <sub>2</sub> |
| 24b      | 1.66 dt (16.8, 3.0)             |                     |                 |
| 25       |                                 | 131.3               | C               |
| 26       | 5.13 bs                         | 120.5               | CH              |
| 27a      | 4.11 brs                        | 65.7                | CH <sub>2</sub> |
| 27b      | 4.04 brs                        |                     |                 |
| 28       | 0.85 d (6.6)                    | 20.2                | CH <sub>3</sub> |
| 29       | 4.95 s, 4.89 s                  | 113.4               | CH <sub>2</sub> |
| 30       | 1.50 s                          | 23.0                | CH <sub>3</sub> |

<sup>a</sup> measured at 500 MHz ( $^1\text{H}$ ) and 125 MHz ( $^{13}\text{C}$ )

**Table S3.**  $^1\text{H}$  and  $^{13}\text{C}$  NMR<sup>a</sup> data of **2** in  $\text{C}_6\text{D}_6$ 

| <b>2</b> |                               |                     |                 |
|----------|-------------------------------|---------------------|-----------------|
| position | $\delta_{\text{H}}$ (J in HZ) | $\delta_{\text{C}}$ | C mult.         |
| 1        |                               | 166.3               | C               |
| 2        | 5.72 d (12.0)                 | 120.8               | CH              |
| 3        | 6.06 ddd (11.4, 9.6, 3.6)     | 150.7               | CH              |
| 4a       | 3.90 m                        | 34.1                | CH <sub>2</sub> |
| 4b       | 2.15 ddd (16.8, 6.6, 3.6)     |                     |                 |
| 5        | 4.37 m                        | 73.3                | CH              |
| 6        | 5.56 dq (10.2, 3.0)           | 129.3               | CH              |
| 7        | 5.65 ddd (9.6, 4.8, 2.4)      | 125.4               | CH              |
| 8a       | 1.79 m                        | 32.1                | CH <sub>2</sub> |
| 8b       | 1.71 (17.8, 7.8, 4.2)         |                     |                 |
| 9        | 3.70 dd (9.0, 3.0)            | 68.0                | CH              |
| 10a      | 1.55 dd (14.4, 8.4)           | 44.0                | CH <sub>2</sub> |
| 10b      | 1.19 ddd (14.4, 4.2, 3.0)     |                     |                 |
| 11       | 1.75 m                        | 30.0                | CH              |
|          | 2.60 dd (13.2, 4.8)           |                     |                 |
| 12a      |                               | 46.0                | CH <sub>2</sub> |
| 12b      | 1.80 m                        |                     |                 |
| 13       |                               | 146.1               | C               |
| 14a      | 2.15 m                        | 35.8                | CH <sub>2</sub> |
| 14b      | 2.14 m                        |                     |                 |
| 15       | 3.95 m                        | 67.6                | CH              |
| 16       | 2.76 dd (3.2, 2.8)            | 60.7                | CH              |
| 17       | 2.95 ddd (9.0, 3.6, 2.4)      | 51.6                | CH              |
| 18a      | 2.22 ddd (13.8, 3.0, 1.2)     | 33.7                | CH <sub>2</sub> |
| 18b      | 1.48 ddd (14.4, 8.4, 3.6)     |                     |                 |
| 19       | 5.15 ddd (9.6, 5.4, 1.8)      | 72.7                | CH              |
| 20       | 4.13 m                        | 73.4                | CH              |
| 21       | 5.74 ddd (16.2, 5.4, 1.8)     | 129.0               | CH              |
| 22       | 5.85 ddd (15.6, 4.8, 1.2)     | 133.7               | CH              |
| 23       | 3.88 m                        | 73.4                | CH              |
| 24a      | 1.95 m                        | 36.1                | CH <sub>2</sub> |
| 24b      | 1.62 m                        |                     |                 |
| 25       |                               | 131.3               | C               |
| 26       | 5.13 brs                      | 120.5               | CH              |
| 27a      | 4.11 brs                      | 65.8                | CH <sub>2</sub> |
| 27b      | 4.04 brs                      |                     |                 |
| 28       | 0.88 d (6.6)                  | 21.1                | CH <sub>3</sub> |
| 29       | 4.93 s, 4.89 s                | 112.6               | CH <sub>2</sub> |
| 30       | 1.51 s                        | 23.0                | CH <sub>3</sub> |

<sup>a</sup> measured at 500 MHz ( $^1\text{H}$ ) and 125 MHz ( $^{13}\text{C}$ )

**Table S4.**  $^1\text{H}$  and  $^{13}\text{C}$  NMR<sup>a</sup> data of **7** in  $\text{C}_6\text{D}_6$  and  $\text{CDCl}_3$ <sup>b</sup>

| <b>7</b> |                                            |                     |                 |        |            |
|----------|--------------------------------------------|---------------------|-----------------|--------|------------|
| position | $\delta_{\text{H}}$ (J in Hz) <sup>b</sup> | $\delta_{\text{C}}$ | C mult.         | COSY   | HMBC       |
| 1        |                                            | 165.3               | C               |        |            |
| 2        | 5.85 d (11.5)                              | 123.5               | CH              | 3      | 1          |
| 3        | 6.21 ddd (10.5, 10.0, 7.0)                 | 142.6               | CH              | 2, 4a  |            |
| 4a       | 3.16 ddd (11.0, 11.0, 4.5)                 | 35.8                | CH <sub>2</sub> | 3, 5   | 2, 3, 5, 6 |
| 4b       | 2.51 ddd (11.0, 10.5, 7.0)                 |                     |                 |        |            |
| 5        | 4.26 m                                     | 73.3                | CH              | 4      |            |
| 6        | 5.76 ddd (10.5, 4.5, 3.0)                  | 129.2               | CH              | 7      | 8          |
| 7        | 5.89 ddd (10.5, 5.0, 2.5)                  | 125.3               | CH              | 6, 8   | 6, 8       |
| 8a       | 2.00 dd (14.0, 9.0)                        | 32.1                | CH <sub>2</sub> | 7, 9   |            |
| 8b       | 1.95 ddd (11.0, 6.0, 2.5)                  |                     |                 |        |            |
| 9        | 3.64 m                                     | 66.7                | CH              | 8, 10  | 8          |
| 10a      | 1.51 ddd (13.5, 9.5, 2.0)                  | 42.9                | CH <sub>2</sub> | 9, 11  | 9, 11, 12  |
| 10b      | 1.15 ddd (14.0, 10.0, 2.5)                 |                     |                 |        |            |
| 11       | 1.86 m                                     | 27.3                | CH              | 10, 28 |            |
| 12a      | 2.11 dd (13.5, 6.5)                        | 45.9                | CH <sub>2</sub> |        |            |
| 12b      | 1.95 m                                     |                     |                 |        |            |
| 13       |                                            | 146                 | C               |        |            |
| 14       | 2.32-2.18 (H14a,b, H18a,18b, H24a,b)*      | 35.1                | CH <sub>2</sub> | 15     | 15         |
| 15       | 4.07 ddd (9.5, 2.5, 2.5)                   | 71.4                | CH              | 14, 16 |            |
| 16       | 4.11 m                                     | 76.1                | CH              | 15, 17 | 15, 17     |
| 17       | 4.38 ddd (10.5, 5.0, 5.0)                  | 78.4                | CH              | 16, 18 |            |
| 18       | 2.32-2.18 (H14a,b, H18a,18b, H24a,b)*      | 34.2                | CH <sub>2</sub> | 17, 19 | 19, 20     |
| 19       | 5.59 dd (3.5, 3.5)                         | 76.8                | CH              | 18, 20 |            |
| 20       | 4.65 dd (4.5, 4.5)                         | 81.4                | CH              | 19, 21 |            |
| 21       | 5.80 ddd (16.0, 5.0, 1.0)                  | 125.5               | CH              | 20, 22 | 20, 22     |
| 22       | 5.95 ddd (15.5, 6.0, 1.5)                  | 130                 | CH              | 21, 23 | 20, 23     |
| 23       | 4.86 ddd (10.5, 5.5, 5.0)                  | 75.7                | CH              | 22, 24 | 24, 25     |
| 24       | 2.32-2.18 (H14a,b, H18a,18b, H24a,b)*      | 36.2                | CH <sub>2</sub> | 23     | 25, 26     |
| 25       |                                            | 155.3               | C               |        |            |
| 26       | 5.80 s                                     | 117.3               | CH              |        | 27         |
| 27       |                                            | 163.7               | C               |        |            |
| 28       | 0.86 d (6.5)                               | 20.1                | CH <sub>3</sub> | 11     | 10, 11, 12 |
| 29       | 4.90 s                                     | 113.6               | CH <sub>2</sub> |        | 12, 13 14  |
| 30       | 1.97 s                                     | 22.2                | CH <sub>3</sub> |        | 24, 25, 26 |

<sup>a</sup> measured at 500 MHz ( $^1\text{H}$ ) and 125 MHz ( $^{13}\text{C}$ )<sup>b</sup> sample run in  $\text{CDCl}_3$ 

\* can be interchanged

**Table S5.**  $^1\text{H}$  and  $^{13}\text{C}$  NMR<sup>a</sup> data of **8** in  $\text{C}_6\text{D}_6$ 

| <b>8</b> |                                               |                     |                 |
|----------|-----------------------------------------------|---------------------|-----------------|
| position | $\delta_{\text{H}}$ ( $J$ in Hz) <sup>b</sup> | $\delta_{\text{C}}$ | C mult.         |
| 1        |                                               | 166.2               | C               |
| 2        | 5.72 d (11.5)                                 | 120.6               | CH              |
| 3        | 6.11 ddd (11.0, 10.5, 2.5)                    | 151.0               | CH              |
| 4a       | 3.90 m                                        | 34.1                | CH <sub>2</sub> |
| 4b       | 2.02 m                                        |                     |                 |
| 5        | 3.96 m                                        | 73.3                | CH              |
| 6        | 5.50 brd (10.5)                               | 129.8               | CH              |
| 7        | 5.62 brd (10.5)                               | 125.4               | CH              |
| 8a       | 1.79 m                                        | 32.1                | CH <sub>2</sub> |
| 8b       | 1.67 m                                        |                     |                 |
| 9        | 3.70 ddd (8.5, 5.0, 4.0)                      | 68.1                | CH              |
| 10a      | 1.50 brd (17.0)                               | 44.0                | CH <sub>2</sub> |
| 10b      | 1.20 ddd (16.0, 4.5, 3.5)                     |                     |                 |
| 11       | 1.78 m                                        | 30.0                | CH              |
| 12a      | 2.60 dd (13.0, 4.5)                           | 46.4                | CH <sub>2</sub> |
| 12b      | 1.85 dd (13.0, 10.0)                          |                     |                 |
| 13       |                                               | 145.8               | C               |
| 14       | 2.12 brs                                      | 37.6                | CH <sub>2</sub> |
| 15       | 3.88 m                                        | 67.4                | CH              |
| 16       | 2.78 dd (2.0, 2.0)                            | 60.8                | CH              |
| 17       | 2.96 brd (10.5)                               | 52.1                | CH              |
| 18a      | 2.16 m                                        | 34.2                | CH <sub>2</sub> |
| 18b      | 1.40 m                                        |                     |                 |
| 19       | 5.12 ddd (11.0, 6.0, 1.0)                     | 72.4                | CH              |
| 20       | 4.13 brd (9.0)                                | 72.5                | CH              |
| 21       | 5.68-5.60 m                                   | 129.2               | CH              |
| 22       | 5.68-5.60 m                                   | 130.0               | CH              |
| 23       | 4.33 brdd (14.0, 3.0)                         | 75.7                | CH              |
| 24b      | 1.60 m                                        | 34.4                | CH <sub>2</sub> |
| 24a      | 1.25 m                                        |                     |                 |
| 25       |                                               | 155.2               | C               |
| 26       | 5.61 s                                        | 117.3               | CH              |
| 27       |                                               | 163.5               | C               |
| 28       | 0.92 d (6.5)                                  | 20.1                | CH <sub>3</sub> |
| 29       | 4.98 brs, 4.96 brs                            | 112.6               | CH <sub>2</sub> |
| 30       | 1.22 s                                        | 22.2                | CH <sub>3</sub> |

<sup>a</sup> measured at 500 MHz ( $^1\text{H}$ ) and 125 MHz ( $^{13}\text{C}$ )



**Table S6.**  $^1\text{H}$  and  $^{13}\text{C}$  NMR<sup>a</sup> data of **9** in  $\text{C}_6\text{D}_6$  and acetone  $d_6$ <sup>b</sup>

| <b>9</b> |                                 |                       |         |      |                   |
|----------|---------------------------------|-----------------------|---------|------|-------------------|
| position | $\delta_{\text{H}}$ (J in Hz)   | $\delta_{\text{C}}$   | C mult. | COSY | HMBC <sup>b</sup> |
| 1        |                                 | 165.3 C               |         |      |                   |
| 2        | 5.84 d (11.5)                   | 123.6 CH              | 3       |      | 1                 |
| 3        | 5.72 ddd (11.5, 10.5, 7.0)      | 142.2 CH              | 2, 4a   |      | 1                 |
| 4a       | 3.05 ddd (14.0, 10.5, 5.0)      | 35.7 CH <sub>2</sub>  | 3, 5    |      | 2, 3, 5           |
| 4b       | 2.15 ddd (14.0, 11.5, 6.5)      |                       |         |      |                   |
| 5        | 4.35 m                          | 73.2 CH               | 4       |      |                   |
| 6        | 5.60 dd (10.0, 2.5)             | 128.8 CH              | 7       |      | 8                 |
| 7        | 5.69 ddd (10.5, 7.5, 2.5)       | 125.5 CH              | 6, 8    |      | 6, 8              |
| 8a       | 1.84 ddd (12.5, 10.0, 2.5)      | 32.1 CH <sub>2</sub>  | 7, 9    |      |                   |
| 8b       | 1.60 dd (14.0, 2.5)             |                       |         |      |                   |
| 9        | 3.45 dq (10.0, 2.4)             | 66.7 CH               | 8, 10   |      | 8                 |
| 10a      | 1.55 dt (14.0, 9.5)             | 42.9 CH <sub>2</sub>  | 9, 11   |      | 9, 11, 12         |
| 10b      | 0.93 ddd (13.5, 8.5, 2.0)       |                       |         |      |                   |
| 11       | 1.95 m                          | 27.3 CH               | 10, 28  |      |                   |
| 12a      | 2.11 dd (14.0, 7.5)             | 45.9 CH <sub>2</sub>  |         |      |                   |
| 12b      | 2.05 m                          |                       |         |      |                   |
| 13       |                                 | 146.1 C               |         |      |                   |
| 14       | 2.30 m                          | 35.7 CH <sub>2</sub>  | 15      |      | 15                |
| 15       | 4.12 ddd (9.5, 3.5, 2.5)        | 71.4 CH               | 14, 16  |      |                   |
| 16       | 3.99 dd (5.0, 2.5)              | 75.7 CH               | 15, 17  |      | 15, 17            |
| 17       | 4.40 ddd (11.5, 6.0, 2.0)       | 78.3 CH               | 16, 18  |      |                   |
| 18       | 2.15 m                          | 35.3 CH <sub>2</sub>  | 17, 19  |      | 19, 20            |
| 19       | 5.47 dt (4.0, 4.0)              | 76.9 CH               | 18, 20  |      |                   |
| 20       | 4.31 dd (4.0, 3.5)              | 81.7 CH               | 19, 21  |      |                   |
| 21       | 5.87 dd (13.0, 4.0)             | 126.2 CH              | 20, 22  |      | 20, 22            |
| 22       | 5.90 dd (14.5, 4.5)             | 132.5 CH              | 21      |      | 20, 23            |
| 23       | 4.25 dddd (11.4, 3.6, 2.8, 0.6) | 64.6 CH               | 22, 24  |      |                   |
| 24a      | 1.50 m                          | 36.1 CH <sub>2</sub>  | 23      |      | 25                |
| 24b      | 1.39 dd (14.5, 11.5)            |                       |         |      | 23                |
| 25       |                                 | 59.3 C                |         |      |                   |
| 26       | 2.68 d (4.2)                    | 59.5 CH               | 27      |      | 27                |
| 27       | 5.13 dd (12.0, 4.2)             | 88.5 CH               | 26, OH  |      |                   |
| 28       | 0.86 d (6.5)                    | 20.1 CH <sub>3</sub>  | 11      |      | 10, 11, 12        |
| 29       | 4.88 s, 4.87 s                  | 113.5 CH <sub>2</sub> |         |      | 12, 13 14         |
| 30       | 0.95 s                          | 21.7 CH <sub>3</sub>  |         |      | 24, 25, 26        |
| OH       | 3.30 d (12.0)                   |                       | 27      |      |                   |

<sup>a</sup> measured at 500 MHz ( $^1\text{H}$ ) and 125 MHz ( $^{13}\text{C}$ )<sup>b</sup> sample run in acetone  $d_6$

**Table S7.**  $^1\text{H}$  and  $^{13}\text{C}$  NMR<sup>a</sup> data of **10** in  $\text{C}_6\text{D}_6$ 

| <b>10</b> |                               |                     |                 |        |            |
|-----------|-------------------------------|---------------------|-----------------|--------|------------|
| position  | $\delta_{\text{H}}$ (J in Hz) | $\delta_{\text{C}}$ | C mult.         | COSY   | HMBC       |
| 1         |                               | 166.3               | C               |        |            |
| 2         | 5.74 d (12.0)                 | 121.0               | CH              | 3      | 1          |
| 3         | 5.72 ddd (11.4, 10.2, 3.6)    | 150.2               | CH              | 2, 4a  | 1          |
| 4a        | 3.92 m                        | 34.1                | CH <sub>2</sub> | 3, 5   | 2, 3, 5    |
| 4b        | 1.46 m                        |                     |                 |        |            |
| 5         | 3.92 m                        | 73.1                | CH              | 4      |            |
| 6         | 5.46 brd (10.2)               | 129.4               | CH              | 7      | 8          |
| 7         | 5.67 brd (10.2)               | 125.3               | CH              | 6, 8   | 6, 8       |
| 8a        | 1.81 m                        | 32.1                | CH <sub>2</sub> | 7, 9   |            |
| 8b        | 1.70 m                        |                     |                 |        |            |
| 9         | 3.71 m                        | 68.0                | CH              | 8, 10  | 8          |
| 10a       | 1.54 ddd (16.8, 9.0, 2.4)     | 43.9                | CH <sub>2</sub> | 9, 11  | 9, 11, 12  |
| 10b       | 1.20 ddd (14.4, 4.8, 3.0)     |                     |                 |        |            |
| 11        | 1.78 m                        | 29.9                | CH              | 10, 28 |            |
| 12a       | 2.61 dd (12.6, 6.0)           | 46.3                | CH <sub>2</sub> |        |            |
| 12b       | 1.90 dd (13.2, 10.2)          |                     |                 |        |            |
| 13        |                               | 145.8               | C               |        |            |
| 14a       | 2.16 dd (13.2, 3.6)           | 35.7                | CH <sub>2</sub> | 15     | 15         |
| 14b       | 2.15 m                        |                     |                 |        |            |
| 15        | 3.96 m                        | 67.5                | CH              | 14, 16 |            |
| 16        | 2.78 dd (2.4, 2.4)            | 60.7                | CH              | 15, 17 | 15, 17     |
| 17        | 2.94 ddd (9.0, 3.0, 1.2)      | 52.0                | CH              | 16, 18 |            |
| 18a       | 2.05 ddd (10.2, 4.2, 1.2)     | 33.6                | CH <sub>2</sub> | 17, 19 | 19, 20     |
| 18b       | 2.02 ddd (10.8, 3.6, 1.2)     |                     |                 |        |            |
| 19        | 5.11 m                        | 72.6                | CH              | 18, 20 |            |
| 20        | 4.15 brd (10.2)               | 73.3                | CH              | 19, 21 |            |
| 21        | 5.62 m                        | 129.2               | CH              | 20, 22 | 20, 22     |
| 22        | 5.62 m                        | 132.5               | CH              | 21     | 20, 23     |
| 23        | 4.18 m                        | 64.4                | CH              | 22, 24 |            |
| 24a       | 1.50 m                        | 36.1                | CH <sub>2</sub> | 23     |            |
| 24b       | 1.27 m                        |                     |                 |        | 23         |
| 25        |                               | 59.3                | C               |        |            |
| 26        | 2.68 d (4.2)                  | 59.5                | CH              | 27     | 27         |
| 27        | 5.13 d (4.2)                  | 88.4                | CH              | 26, OH |            |
| 28        | 0.89 d (6.6)                  | 21.0                | CH <sub>3</sub> | 11     | 10, 11, 12 |
| 29        | 4.93 s, 4.92 s                | 112.5               | CH <sub>2</sub> |        | 12, 13 14  |
| 30        | 0.93 s                        | 21.7                | CH <sub>3</sub> |        | 24, 26     |
| OH        | 3.25 d (12.0)                 |                     |                 | 27     |            |

<sup>a</sup> measured at 500 MHz ( $^1\text{H}$ ) and 125 MHz ( $^{13}\text{C}$ )

**Table S8.**  $^1\text{H}$  and  $^{13}\text{C}$  NMR<sup>a</sup> data of **11** in  $\text{C}_6\text{D}_6$ 

| 11       |                                 |                       |         |      |
|----------|---------------------------------|-----------------------|---------|------|
| position | $\delta_{\text{H}}$ (J in Hz)   | $\delta_{\text{C}}$   | C mult. | COSY |
| 1        |                                 | 165.3 C               |         |      |
| 2        | 5.83 d (12.0)                   | 123.6 CH              | 3       |      |
| 3        | 5.72 ddd (11.4, 10.8, 7.2)      | 142.2 CH              | 2, 4a   |      |
| 4a       | 3.08 ddd (14.4, 10.2, 4.8)      | 35.8 CH <sub>2</sub>  | 3, 5    |      |
| 4b       | 2.16 ddd (15.6, 11.4, 7.0)      |                       | 3, 5    |      |
| 5        | 4.37 m                          | 73.2 CH               | 4, 4'   |      |
| 6        | 5.50 dt (10.8, 3.6)             | 128.8 CH              | 7       |      |
| 7        | 5.62 ddd (10.2, 6.0, 2.4)       | 125.4 CH              | 6, 8    |      |
| 8a       | 1.78 ddd (16.8, 9.0, 4.2)       | 32.1 CH <sub>2</sub>  | 9       |      |
| 8b       | 1.60 m                          |                       | 7       |      |
| 9        | 3.45 dq (10.2, 1.8)             | 66.7 CH               | 8, 8'   |      |
| 10a      | 1.57 m                          | 42.8 CH <sub>2</sub>  | 9       |      |
| 10b      | 0.92 ddd (14.4, 9.6, 1.8)       |                       | 11      |      |
| 11       | 1.90 m                          | 27.4 CH               | 10, 28  |      |
| 12a      | 2.04 m                          | 46.0 CH <sub>2</sub>  |         |      |
| 12b      | 2.02 m                          |                       |         |      |
| 13       |                                 | 146.1 C               |         |      |
| 14a      | 2.25 m                          | 35.7 CH <sub>2</sub>  | 15      |      |
| 14b      | 2.24 m                          |                       |         |      |
| 15       | 4.09 ddd (9.0, 3.6, 2.4)        | 71.3 CH               | 14      |      |
| 16       | 3.97 dd (4.8, 1.8)              | 75.4 CH               | 15, 17  |      |
| 17       | 4.42 ddd (10.8, 3.6, 2.4)       | 78.2 CH               | 16, 18  |      |
| 18a      | 2.06 m                          | 35.1 CH <sub>2</sub>  | 17      |      |
| 18b      | 2.02 m                          |                       | 19      |      |
| 19       | 5.48 dd (3.6, 3.6)              | 76.8 CH               | 18, 20  |      |
| 20       | 4.31 dd (4.8, 4.8)              | 81.9 CH               | 19, 21  |      |
| 21       | 5.94 dd (15.0, 4.8)             | 125.8 CH              | 20, 22  |      |
| 22       | 6.04 dd (15.6, 4.8)             | 132.9 CH              | 21      |      |
| 23       | 4.50 dddd (12.0, 4.8, 2.4, 1.0) | 66.6 CH               | 22, 24  |      |
| 24a      | 1.93 dd (15.0, 10.8)            | 36.1 CH <sub>2</sub>  | 23      |      |
| 24b      | 1.45 m                          |                       |         |      |
| 25       |                                 | 136.4 C               |         |      |
| 26       | 5.45 brs                        | 120.8 CH              | 27, 30  |      |
| 27       | 4.92 brs                        | 96.8 CH               | 26, 30  |      |
| 28       | 0.84 d (6.6)                    | 20.2 CH <sub>3</sub>  | 11      |      |
| 29       | 4.85 brs, 4.87 brs              | 113.3 CH <sub>2</sub> | 14      |      |
| 30       | 1.43 s                          | 22.5 CH <sub>3</sub>  | 26, 27  |      |
| OMe      | 3.34 s                          | 54.9 CH <sub>3</sub>  |         |      |

<sup>a</sup> measured at 500 MHz ( $^1\text{H}$ ) and 125 MHz ( $^{13}\text{C}$ )

**Table S9.**  $^1\text{H}$  and  $^{13}\text{C}$  NMR<sup>a</sup> data of **12** in  $\text{C}_6\text{D}_6$ 

| <b>12</b> |                                  |                       |         |      |
|-----------|----------------------------------|-----------------------|---------|------|
| position  | $\delta_{\text{H}}$ ( $J$ in Hz) | $\delta_{\text{C}}$   | C mult. | COSY |
| 1         |                                  | 165.3 C               |         |      |
| 2         | 5.86 d (12.0)                    | 123.6 CH              | 3       |      |
| 3         | 5.73 ddd (12.0, 10.5, 7.0)       | 142.3 CH              | 2, 4a   |      |
| 4a        | 3.12 ddd (11.0, 5.0, 1.2)        | 35.8 CH <sub>2</sub>  | 3, 5    |      |
| 4b        | 2.12 m                           |                       | 3, 5    |      |
| 5         | 4.44 m                           | 73.3 CH               | 4, 4'   |      |
| 6         | 5.58 ddd (10.5, 3.0, 1.5)        | 128.9 CH              | 7       |      |
| 7         | 5.65 dd (10.5, 5.5)              | 125.5 CH              | 6, 8    |      |
| 8a        | 1.84 ddd (12.5, 9.5, 2.0)        | 32.1 CH <sub>2</sub>  | 9       |      |
| 8b        | 1.50 m                           |                       | 7       |      |
| 9         | 3.48 tt (10.0, 2.5)              | 66.8 CH               | 8, 8'   |      |
| 10a       | 1.55 m                           | 42.8 CH <sub>2</sub>  | 9       |      |
| 10b       | 0.94 ddd (13.5, 9.0, 2.0)        |                       | 11      |      |
| 11        | 1.95 m                           | 27.4 CH               | 10, 28  |      |
| 12a       | 2.15 m                           | 46.0 CH <sub>2</sub>  |         |      |
| 12b       | 2.05 m                           |                       |         |      |
| 13        |                                  | 146.1 C               |         |      |
| 14a       | 2.35 m                           | 35.7 CH <sub>2</sub>  | 15      |      |
| 14b       | 2.34 m                           |                       |         |      |
| 15        | 4.14 dt (9.5, 3.0)               | 71.5 CH               | 14      |      |
| 16        | 4.09 dd (9.0, 6.5)               | 75.6 CH               | 15, 17  |      |
| 17        | 4.48 ddd (10.5, 5.5, 5.1)        | 78.4 CH               | 16, 18  |      |
| 18a       | 2.15 m                           | 35.1 CH <sub>2</sub>  | 17      |      |
| 18b       | 2.02 m                           |                       | 19      |      |
| 19        | 5.54 dt (4.5, 3.5)               | 77.0 CH               | 18, 20  |      |
| 20        | 4.50 dd (4.5, 3.5)               | 82.0 CH               | 19, 21  |      |
| 21        | 5.97 ddd (16.0, 5.5, 1.0)        | 126.2 CH              | 20, 22  |      |
| 22        | 6.07 ddd (15.5, 5.0, 1.0)        | 133.4 CH              | 21      |      |
| 23        | 4.57 dddd (10.7, 4.5, 2.0, 1.0)  | 66.6 CH               | 22, 24  |      |
| 24a       | 2.15 m                           | 36.1 CH <sub>2</sub>  | 23      |      |
| 24b       | 1.60 m                           |                       | 23      |      |
| 25        |                                  | 136.3 C               |         |      |
| 26        | 5.41 brs                         | 121.6 CH              | 27, 30  |      |
| 27        | 5.35 brs                         | 89.0 CH               | 26, 30  |      |
| 28        | 0.87 d (6.0)                     | 20.2 CH <sub>3</sub>  | 11      |      |
| 29        | 4.92 brs, 4.89 brs               | 113.5 CH <sub>2</sub> | 14      |      |
| 30        | 1.46 s                           | 22.7 CH <sub>3</sub>  | 26, 27  |      |

<sup>a</sup> measured at 500 MHz ( $^1\text{H}$ ) and 125 MHz ( $^{13}\text{C}$ )

**Table 10.** 1D <sup>1</sup>H NMR Difference of NOE Enhancements<sup>a</sup> Observed for Fijianolide G (**10**) at H-23,<sup>b</sup> H-26,<sup>c</sup> H-27<sup>d</sup> and CH<sub>3</sub>-30<sup>e</sup> in C<sub>6</sub>D<sub>6</sub>.

| Expt | H irradiat | NOE | rel enhanc inten <sup>a</sup> |
|------|------------|-----|-------------------------------|
| A    | 23         | 21  | 2.2                           |
|      |            | 22  | 2.2                           |
|      |            | 24a | 1.1                           |
| B    | 26         | 27  | 1.7                           |
|      |            | 30  | 1.9                           |
| C    | 27         | 26  | 1                             |

<sup>a</sup> Relative enhanced intensity data based on setting the height of the weakest difference NOE peak as "1". <sup>b</sup> Actual spectrum is shown in Figure S22. <sup>c</sup> Actual spectrum is shown in Figure S23.

<sup>d</sup> Actual spectrum is shown in Figure S24.

**Table S11.** Cytotoxicity in zone units of the fijianolides in the disk diffusion soft agar colony formation assay<sup>a</sup>

| Compound      | Conc.<br>µg/disk | Murine tumor cell lines |      | Human tumor cell lines |       |       | CFU-GM |
|---------------|------------------|-------------------------|------|------------------------|-------|-------|--------|
|               |                  | L1210                   | C 38 | H-116                  | H-125 | CEM   |        |
| Fijianolide A | 30               | 150                     | 0    | 100                    | 50    |       |        |
| Fijianolide B | 36               |                         | 800  |                        |       | >1000 |        |
| “             | 9                | 500                     |      | 700                    | 250   |       | 550    |
| Fijianolide D | 100              | 0                       | 150  | 0                      | 0     |       |        |
| Fijianolide E | 40               | 350                     | 400  | 500                    | 400   | 550   | 500    |
| Fijianolide F | 60               | 150                     | 0    | 50                     | 100   |       |        |
| Fijianolide G | 30               | 150                     | 350  | 200                    | 200   |       | 100    |
| Fijianolide H | 40               | 0                       | 150  | 0                      | 0     |       |        |
| Fijianolide I | 30               | 0                       | 50   | 0                      | 0     |       |        |

<sup>a</sup> measured in zone units: 200 zone units = 6mm. Murine cell lines: L1210 (lymphocytic leukemia), C38 (colon adenocarcinoma), CFU(GM) (colony-forming unit-granulocyte macrophage; normal hematopoietic); Human cell lines: H116 (colon), H125 (lung), CEM (leukemia), CFU(GM) (colony-forming unit-granulocyte macrophage; normal hematopoietic). <sup>b</sup> Significant selectivity is defined by a difference of 250 zone units.

**Figure S1.** Selected examples of cytotoxic marine-derived polyketides.

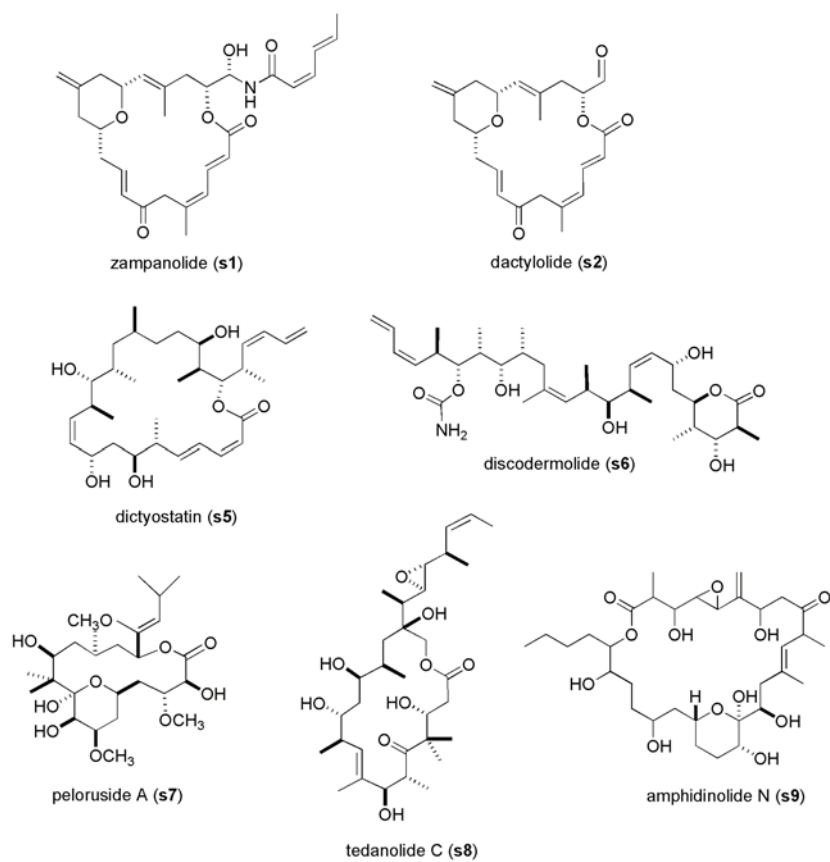

**Figure S2.**  $^1\text{H}$  NMR spectrum of fijianolide A (**1**), (500 MHz,  $\text{C}_6\text{D}_6$ )

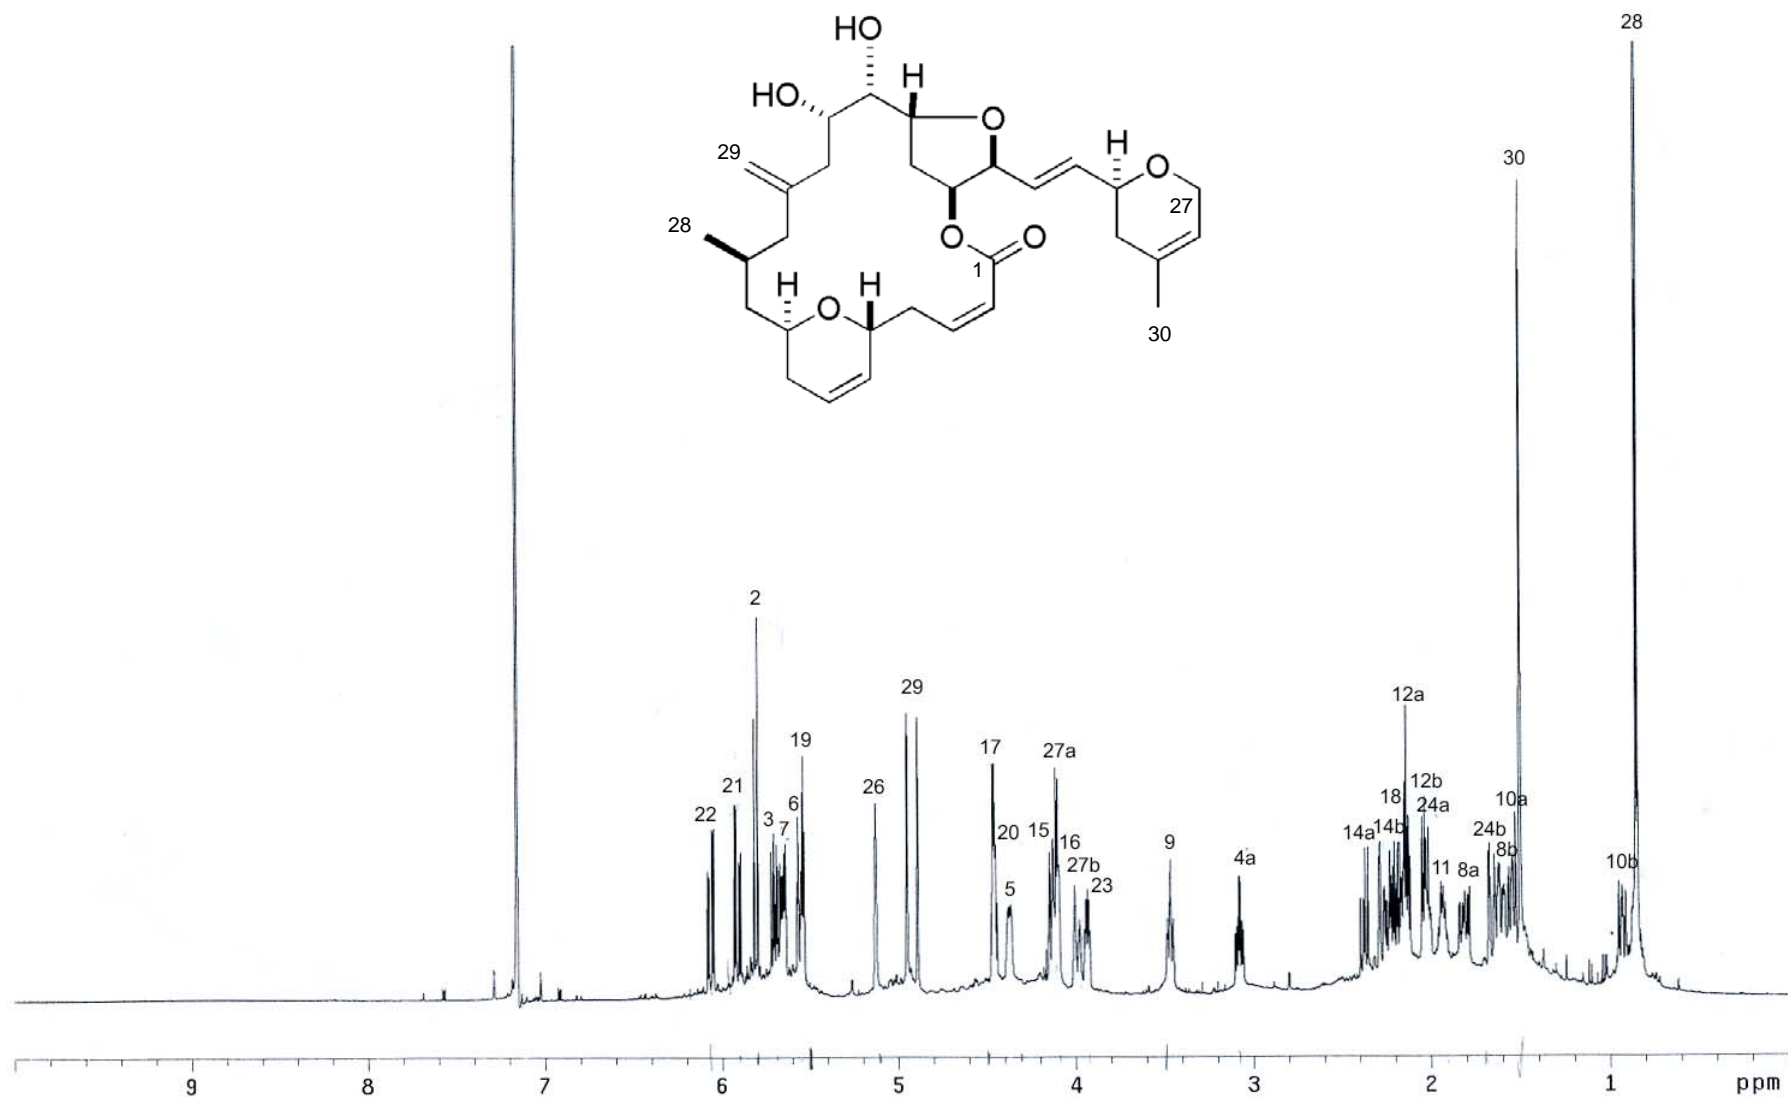



**Figure S3.**  $^{13}\text{C}$  NMR spectrum of fijianolide A (**1**), (125 MHz,  $\text{C}_6\text{D}_6$ )

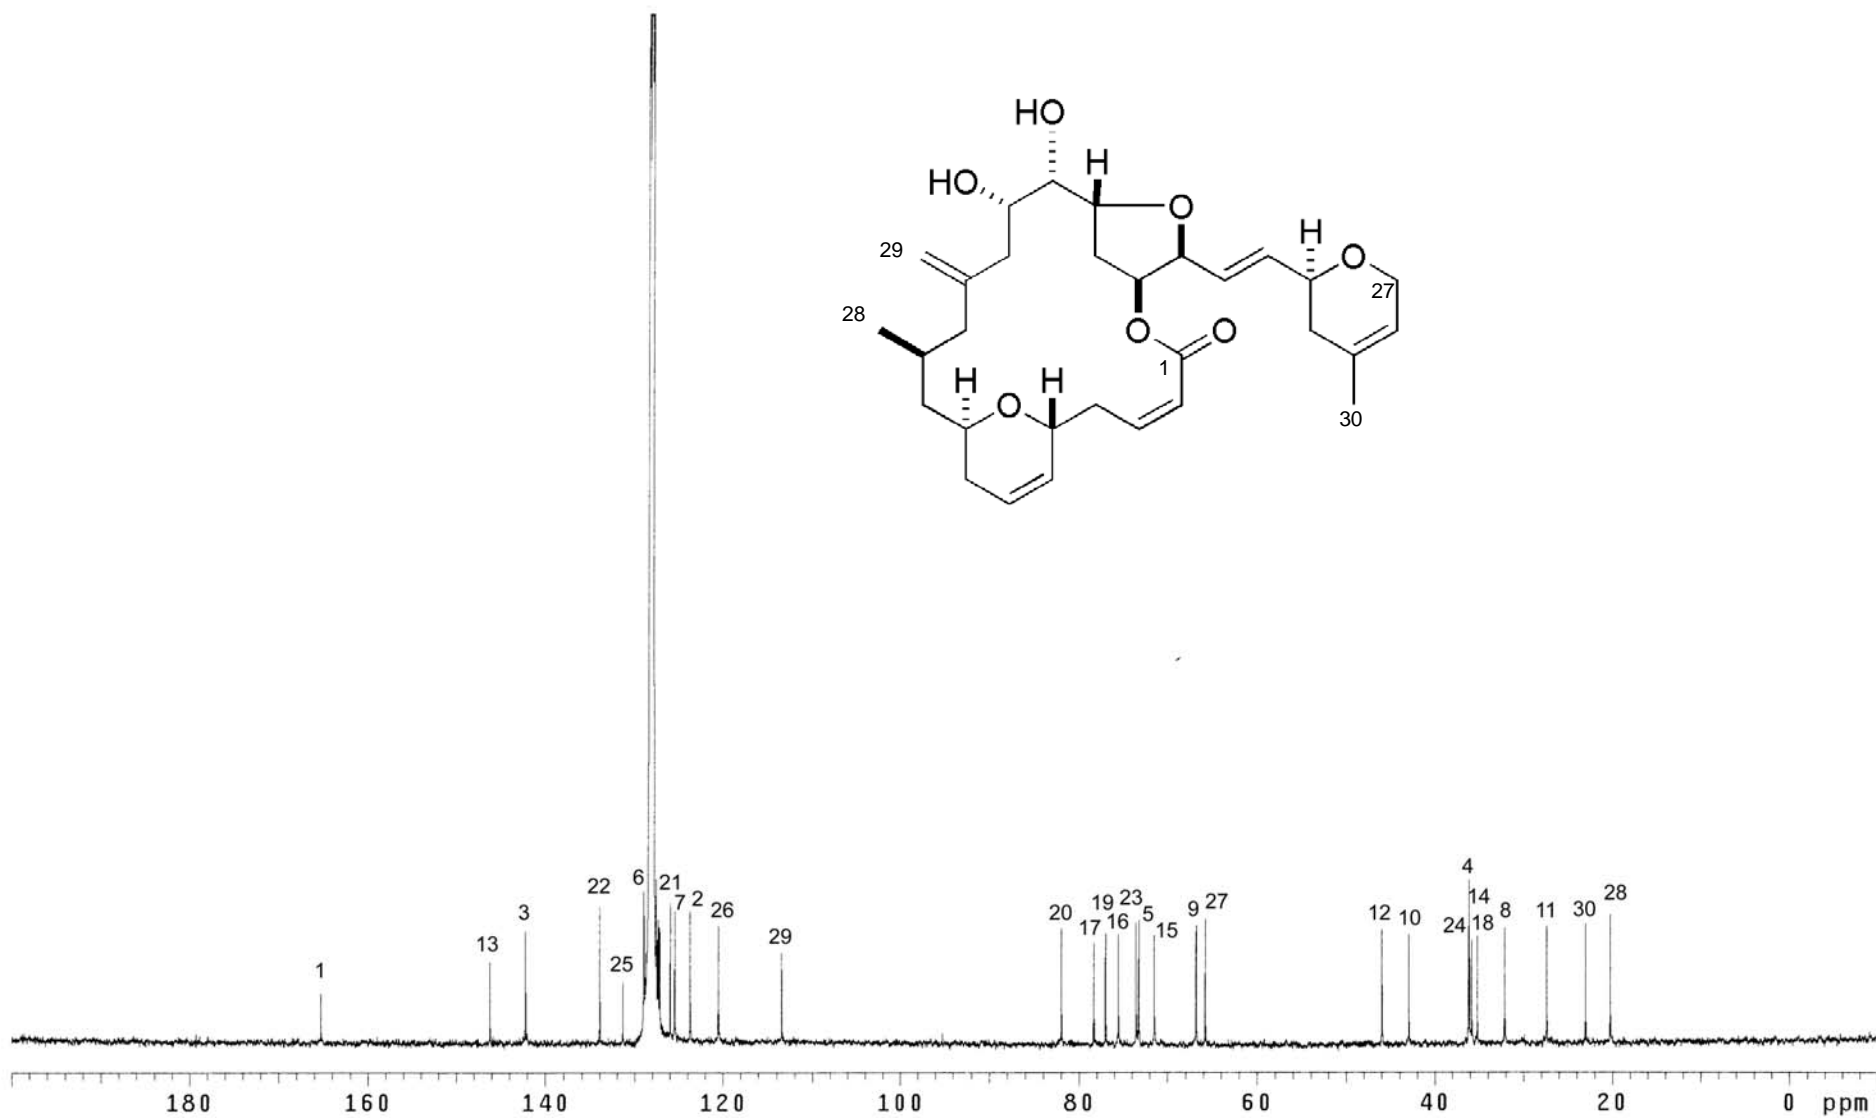

**Figure S4.**  $^1\text{H}$  NMR spectrum of fijianolide B (**2**), (500 MHz,  $\text{C}_6\text{D}_6$ )

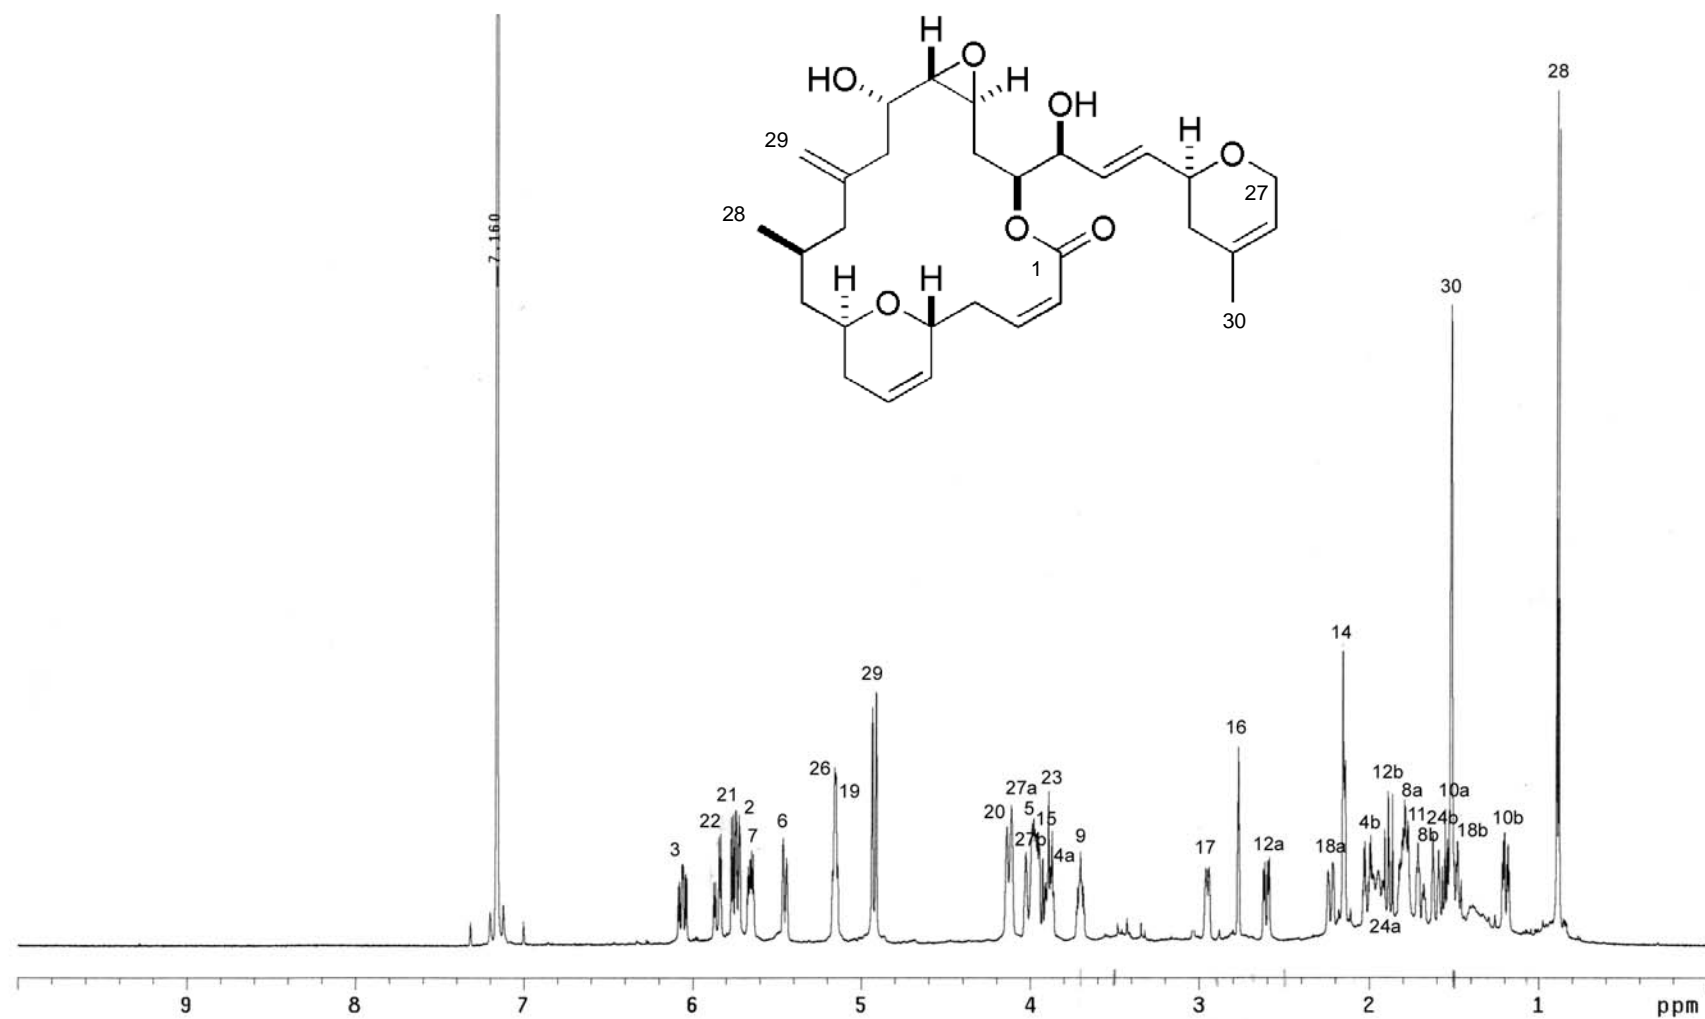

**Figure S5.**  $^{13}\text{C}$  NMR spectrum of fijianolide B (**2**), (125 MHz,  $\text{C}_6\text{D}_6$ )

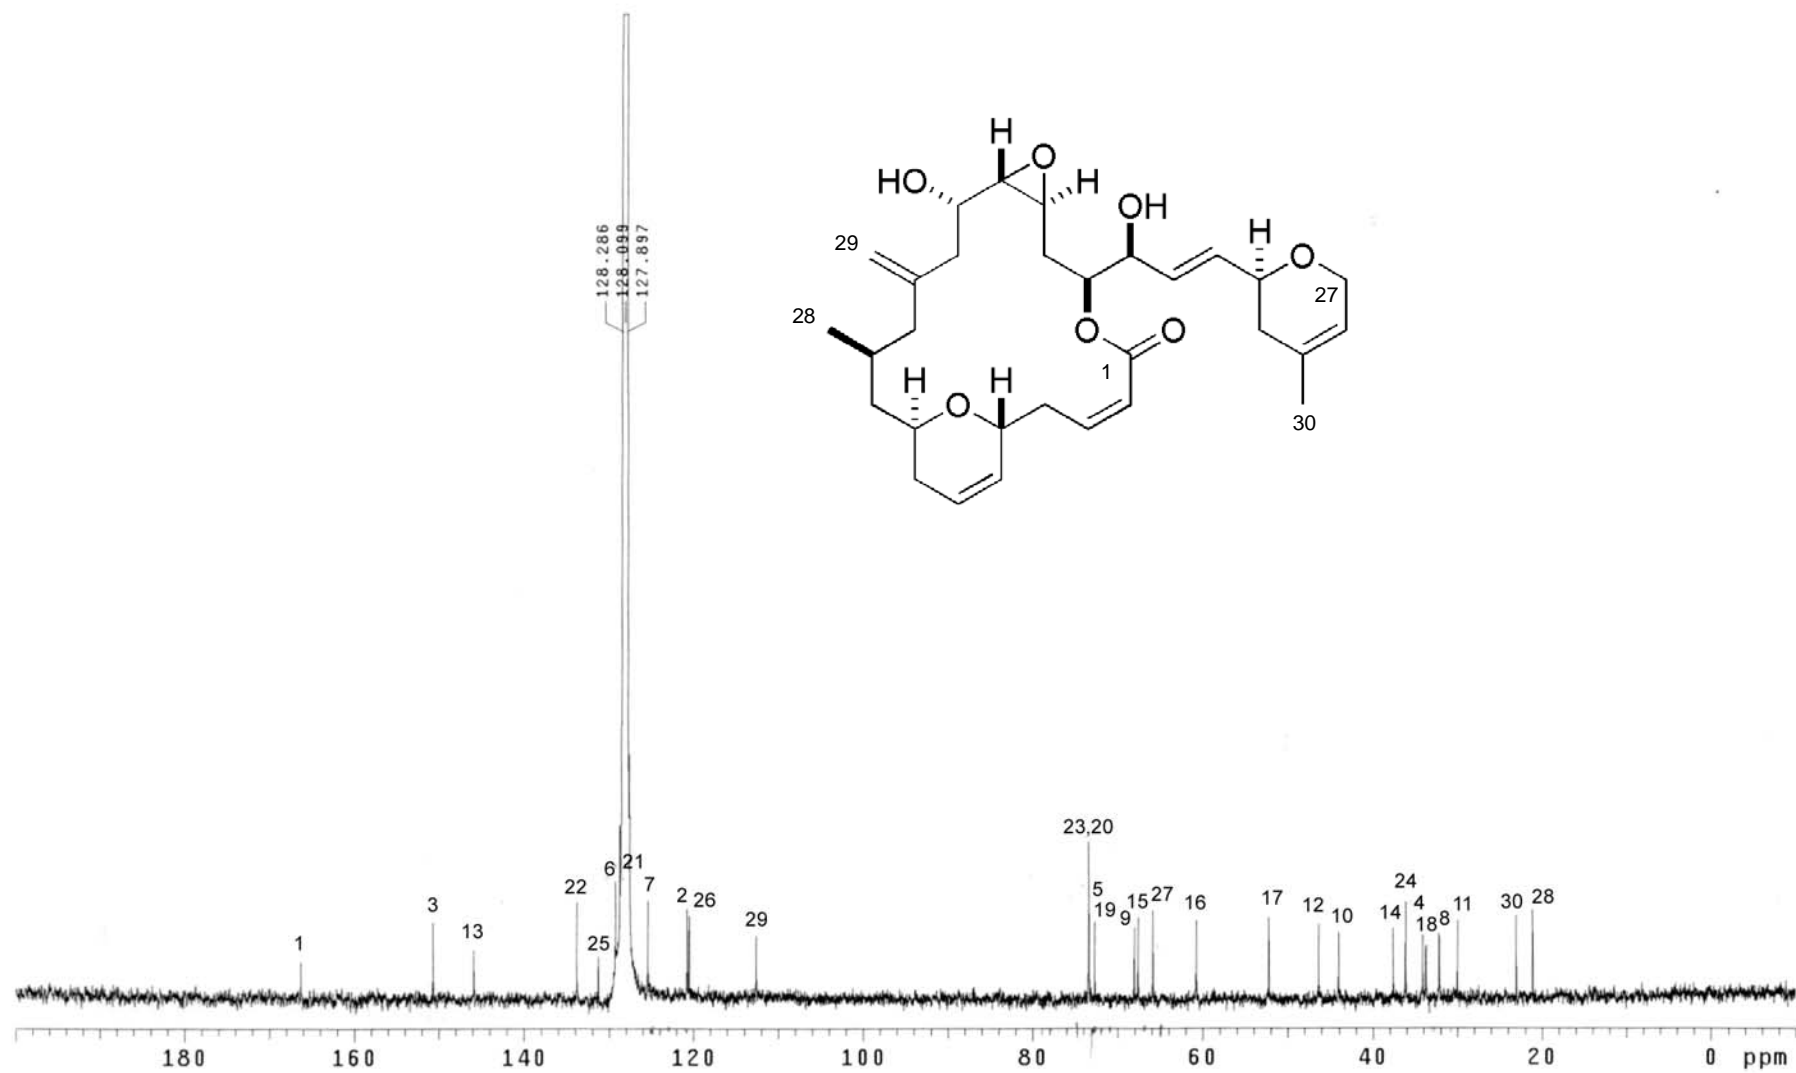

**Figure S6.**  $^1\text{H}$  NMR spectrum of fijianolide D (**7**), (500 MHz,  $\text{CDCl}_3$ )

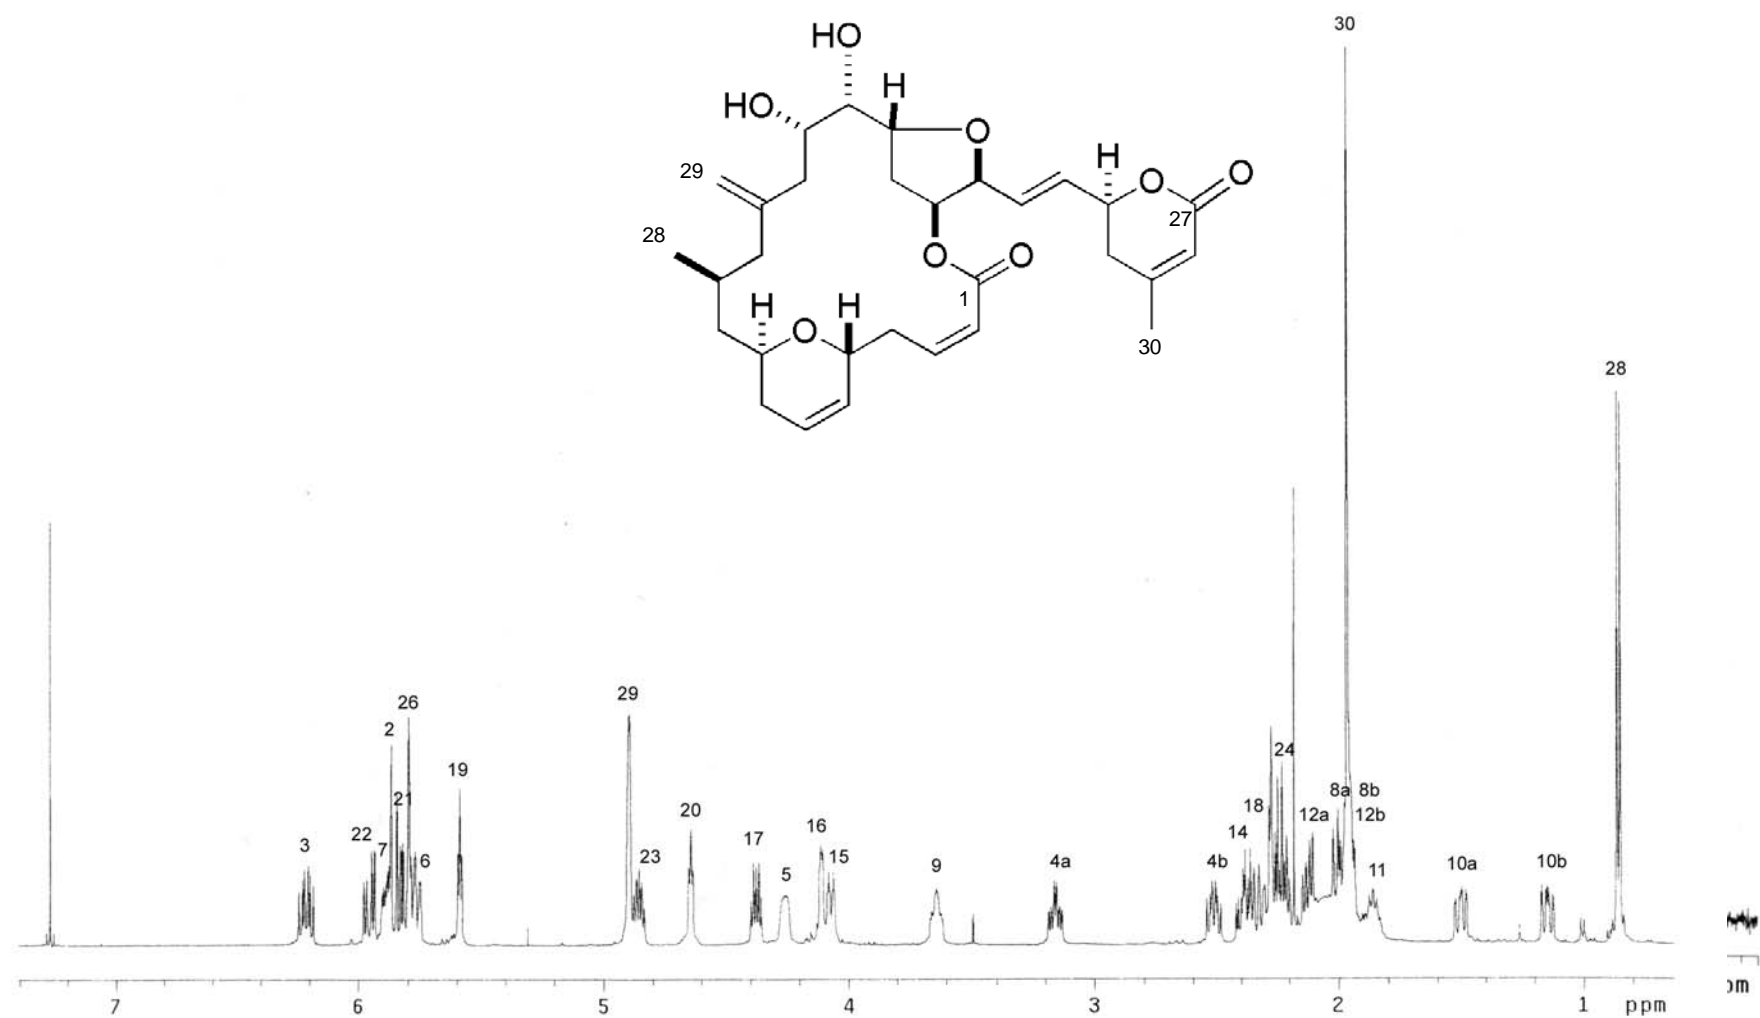

**Figure S7.**  $^{13}\text{C}$  NMR spectrum of fijianolide D (**7**), (125 MHz,  $\text{C}_6\text{D}_6$ )

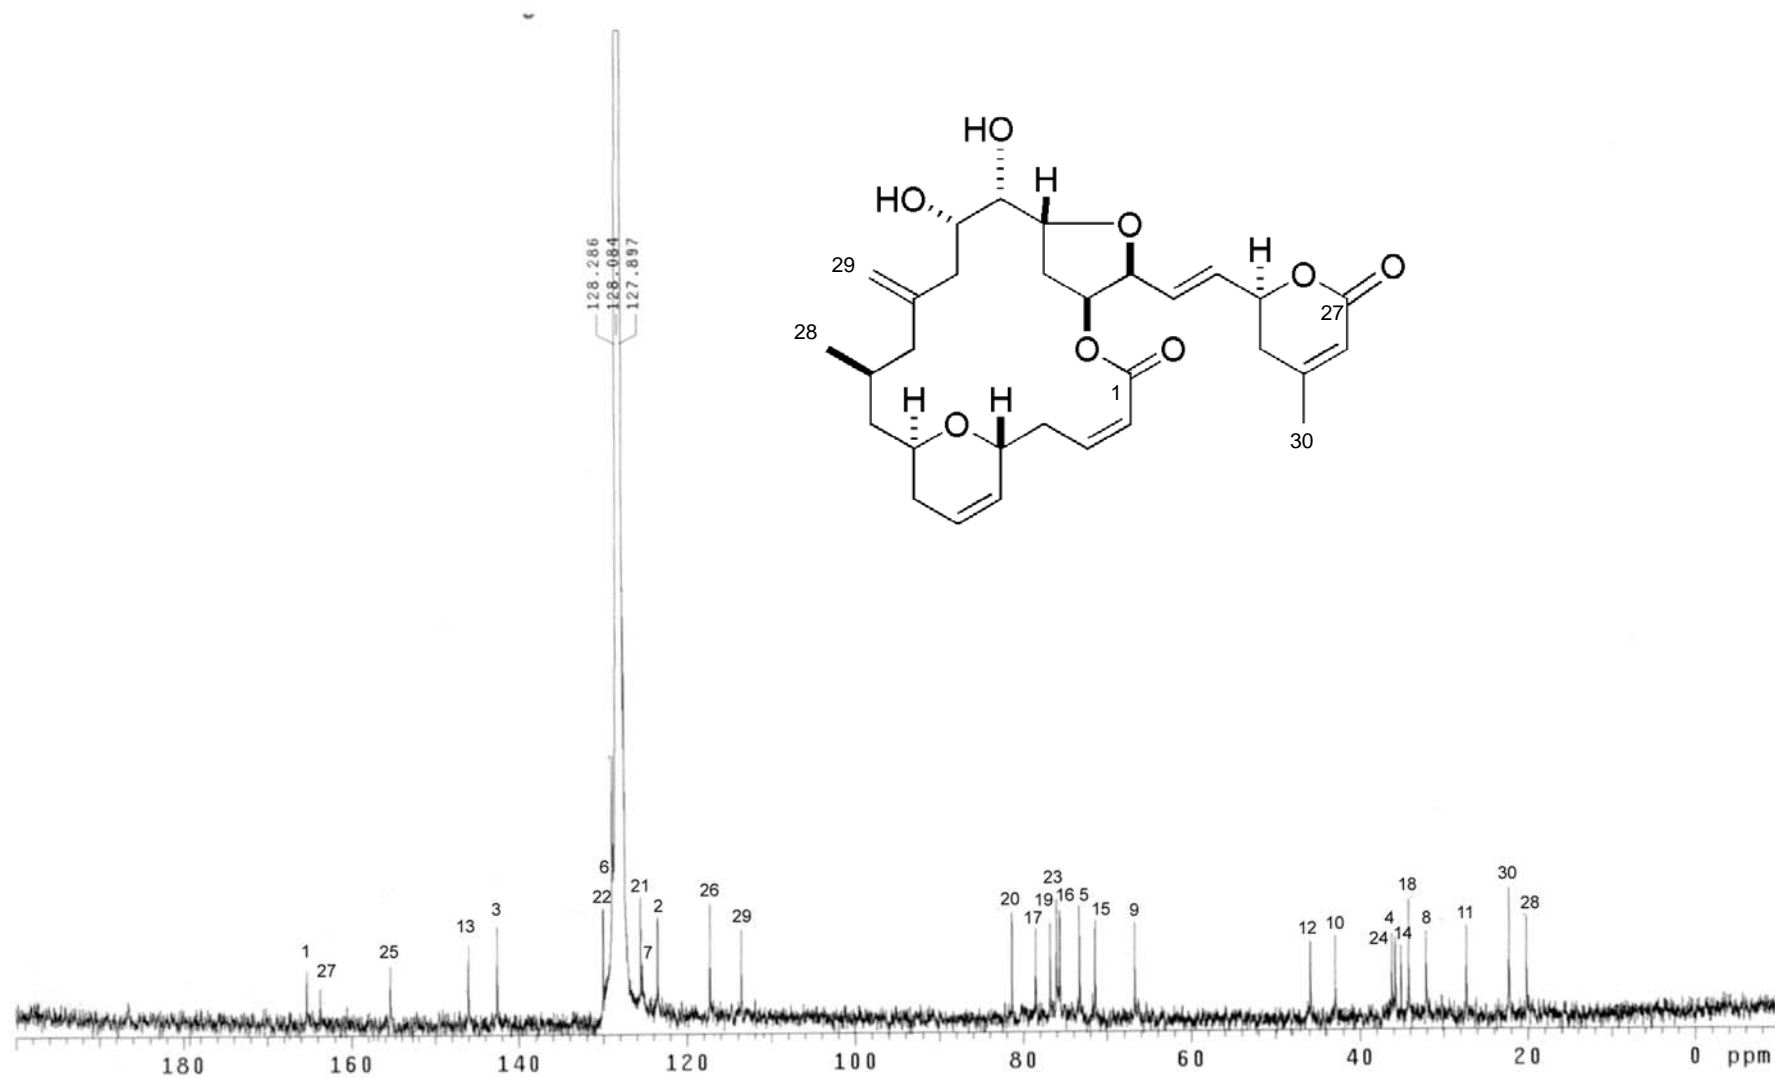

**Figure S8.**  $^1\text{H}$  NMR spectrum of fijianolide E (8), (500 MHz,  $\text{C}_6\text{D}_6$ )

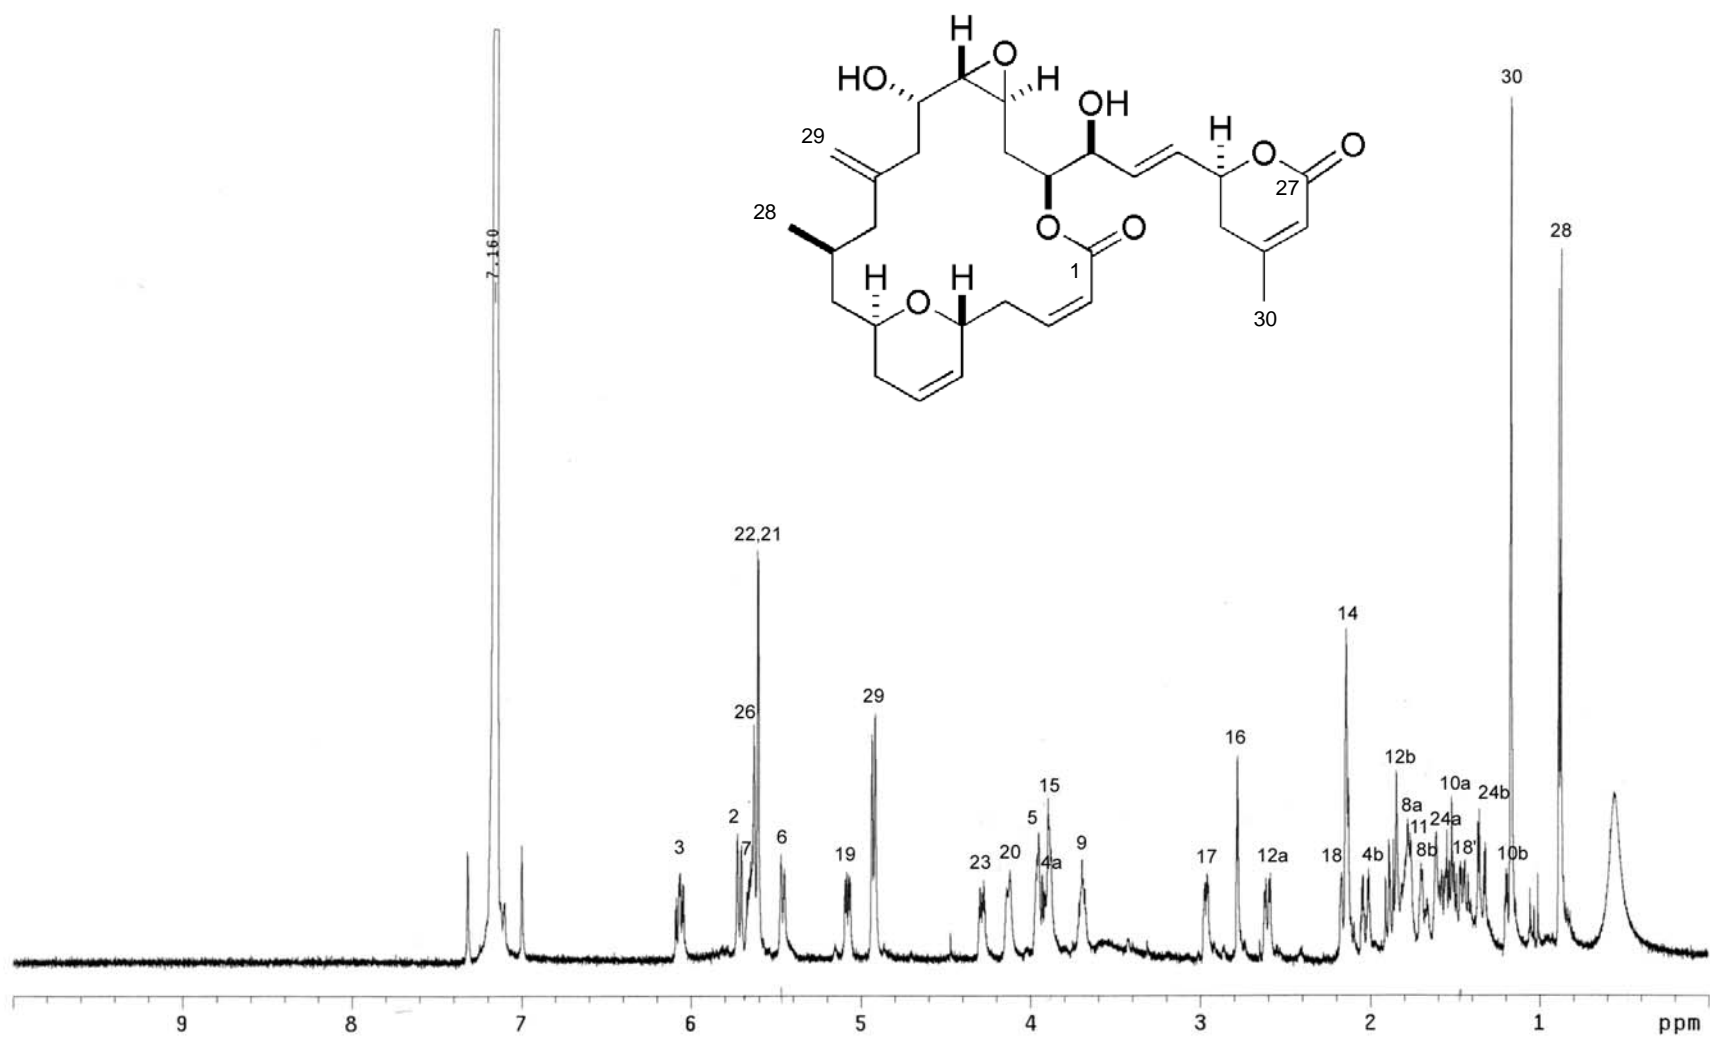

**Figure S9.**  $^{13}\text{C}$  NMR spectrum of fijianolide E (**8**), (125 MHz,  $\text{C}_6\text{D}_6$ )

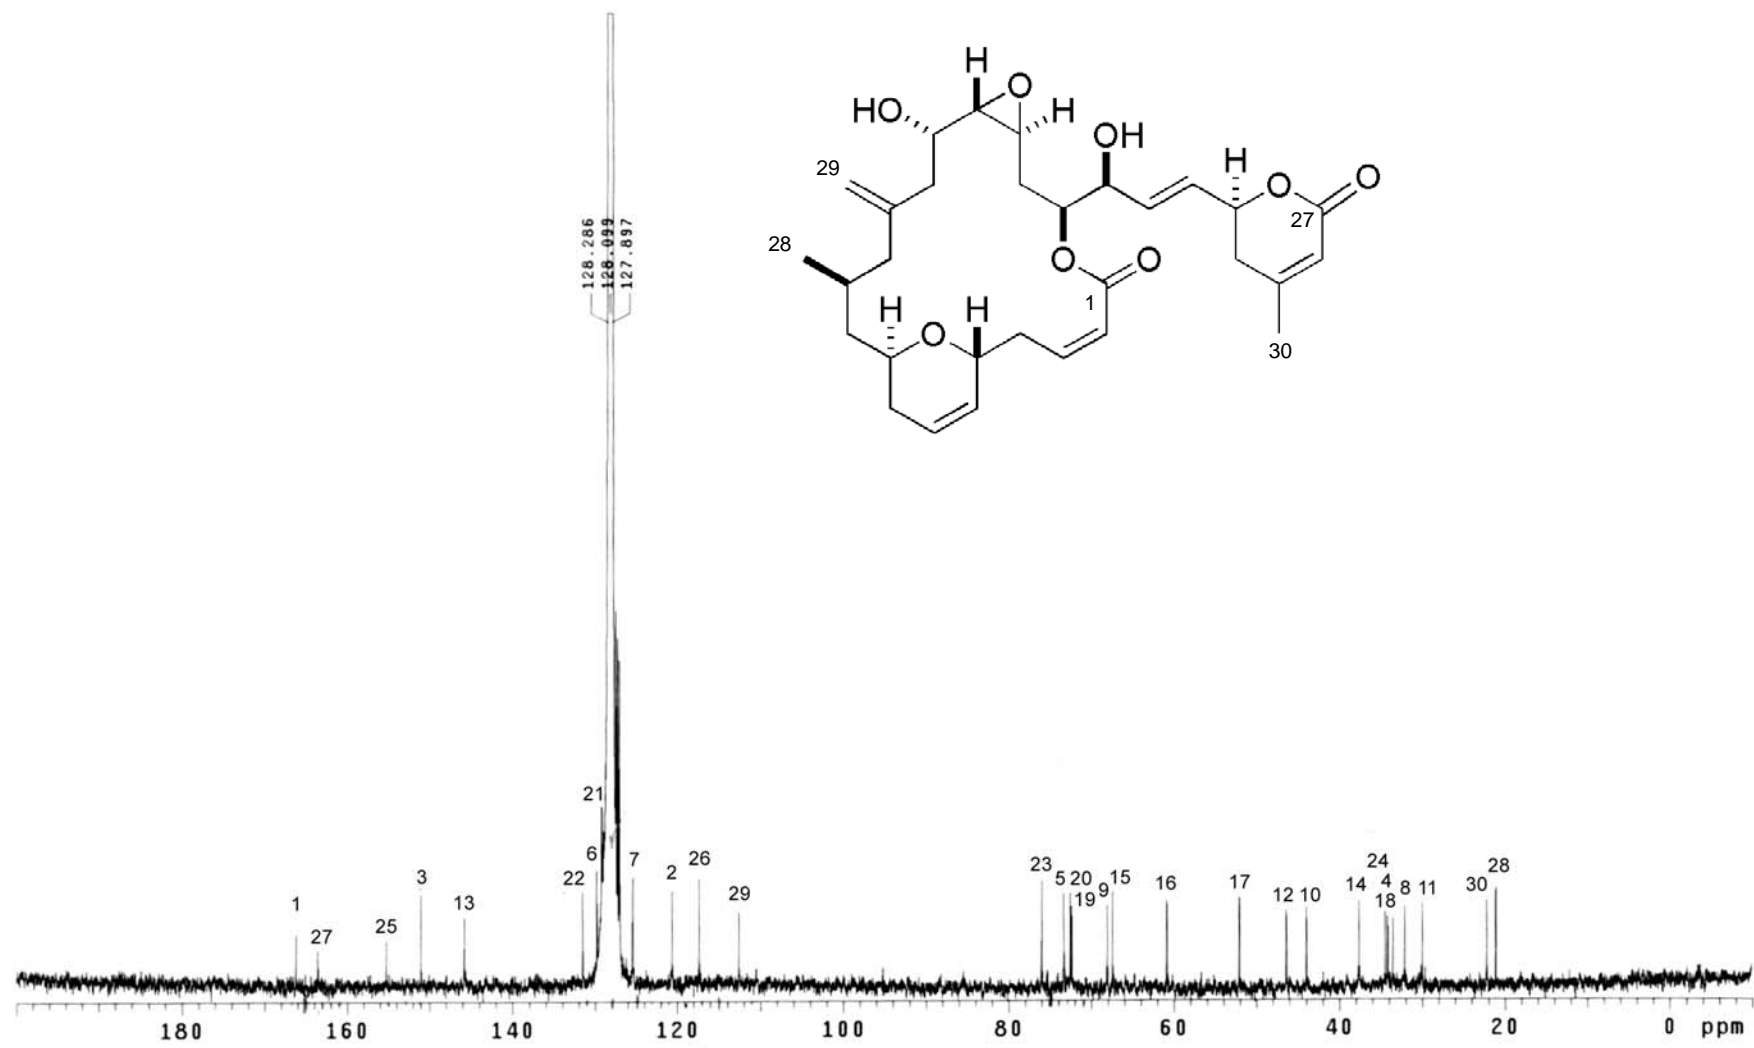

**Figure S10.**  $^1\text{H}$  NMR spectrum of fijianolide F (**9**), (500 MHz,  $\text{C}_6\text{D}_6$ )

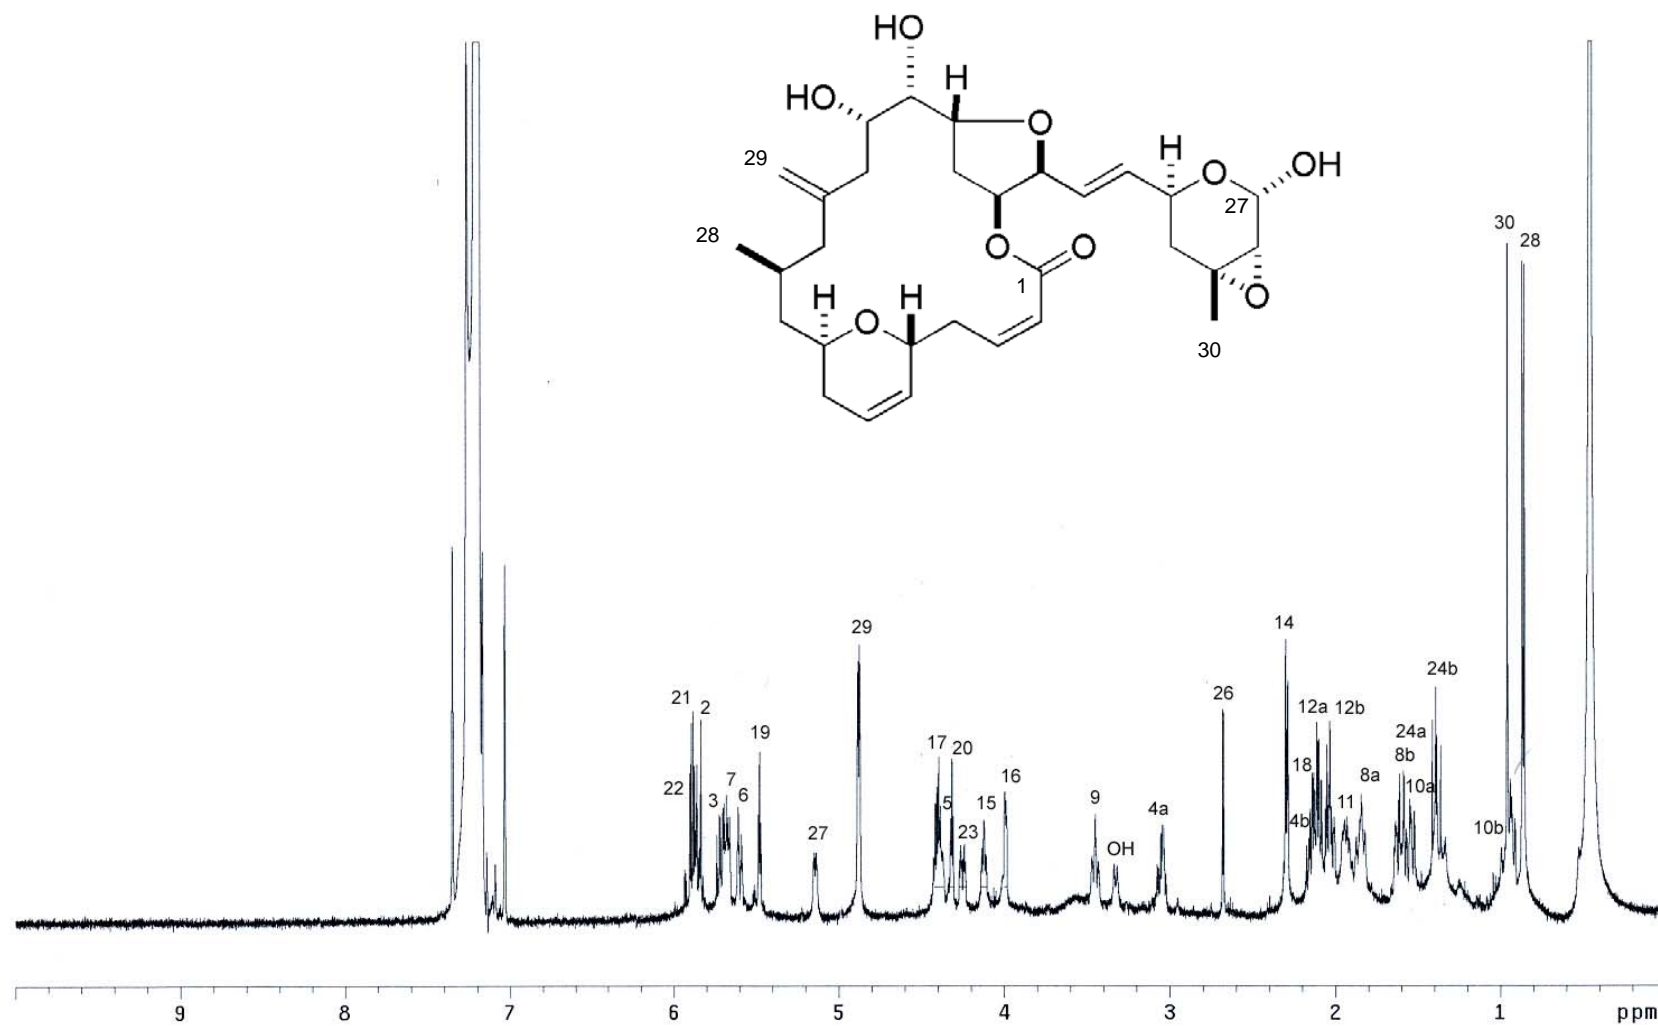



**Figure S11.**  $^{13}\text{C}$  NMR spectrum of fujianolide F (**9**), (125 MHz,  $\text{C}_6\text{D}_6$ )

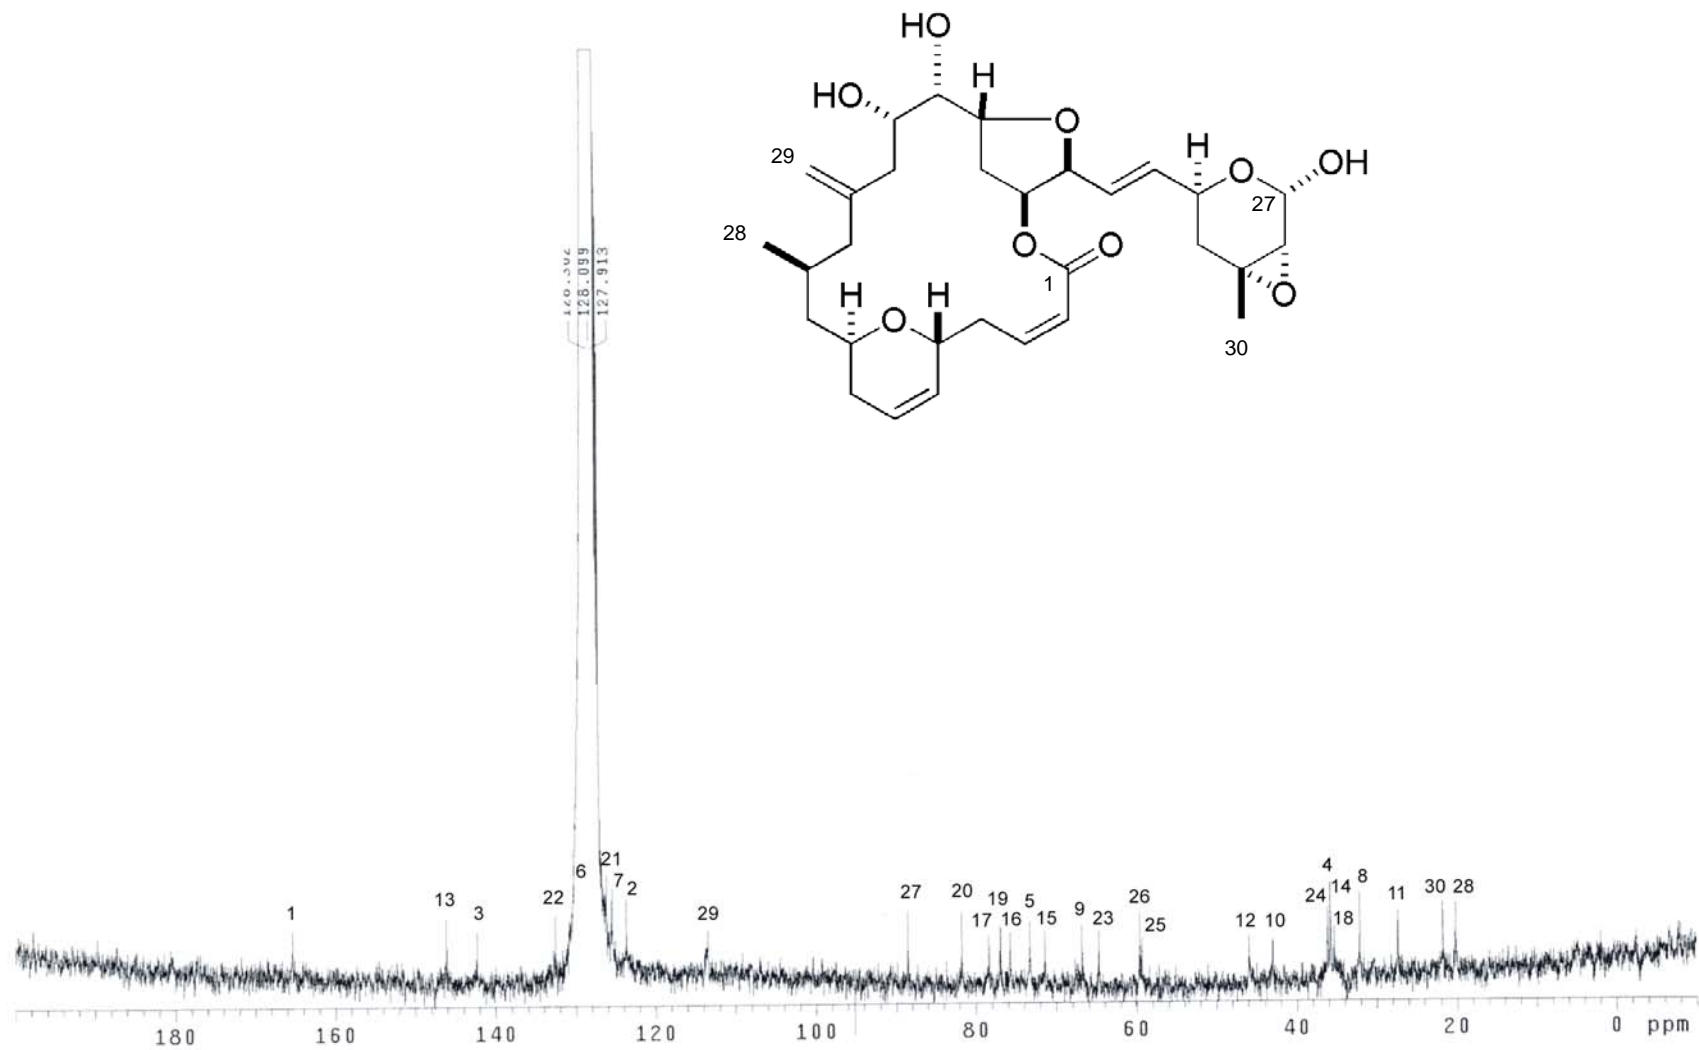

**Figure S12.**  $^1\text{H}$  NMR spectrum of fujianolide G (**10**), (500 MHz,  $\text{C}_6\text{D}_6$ )

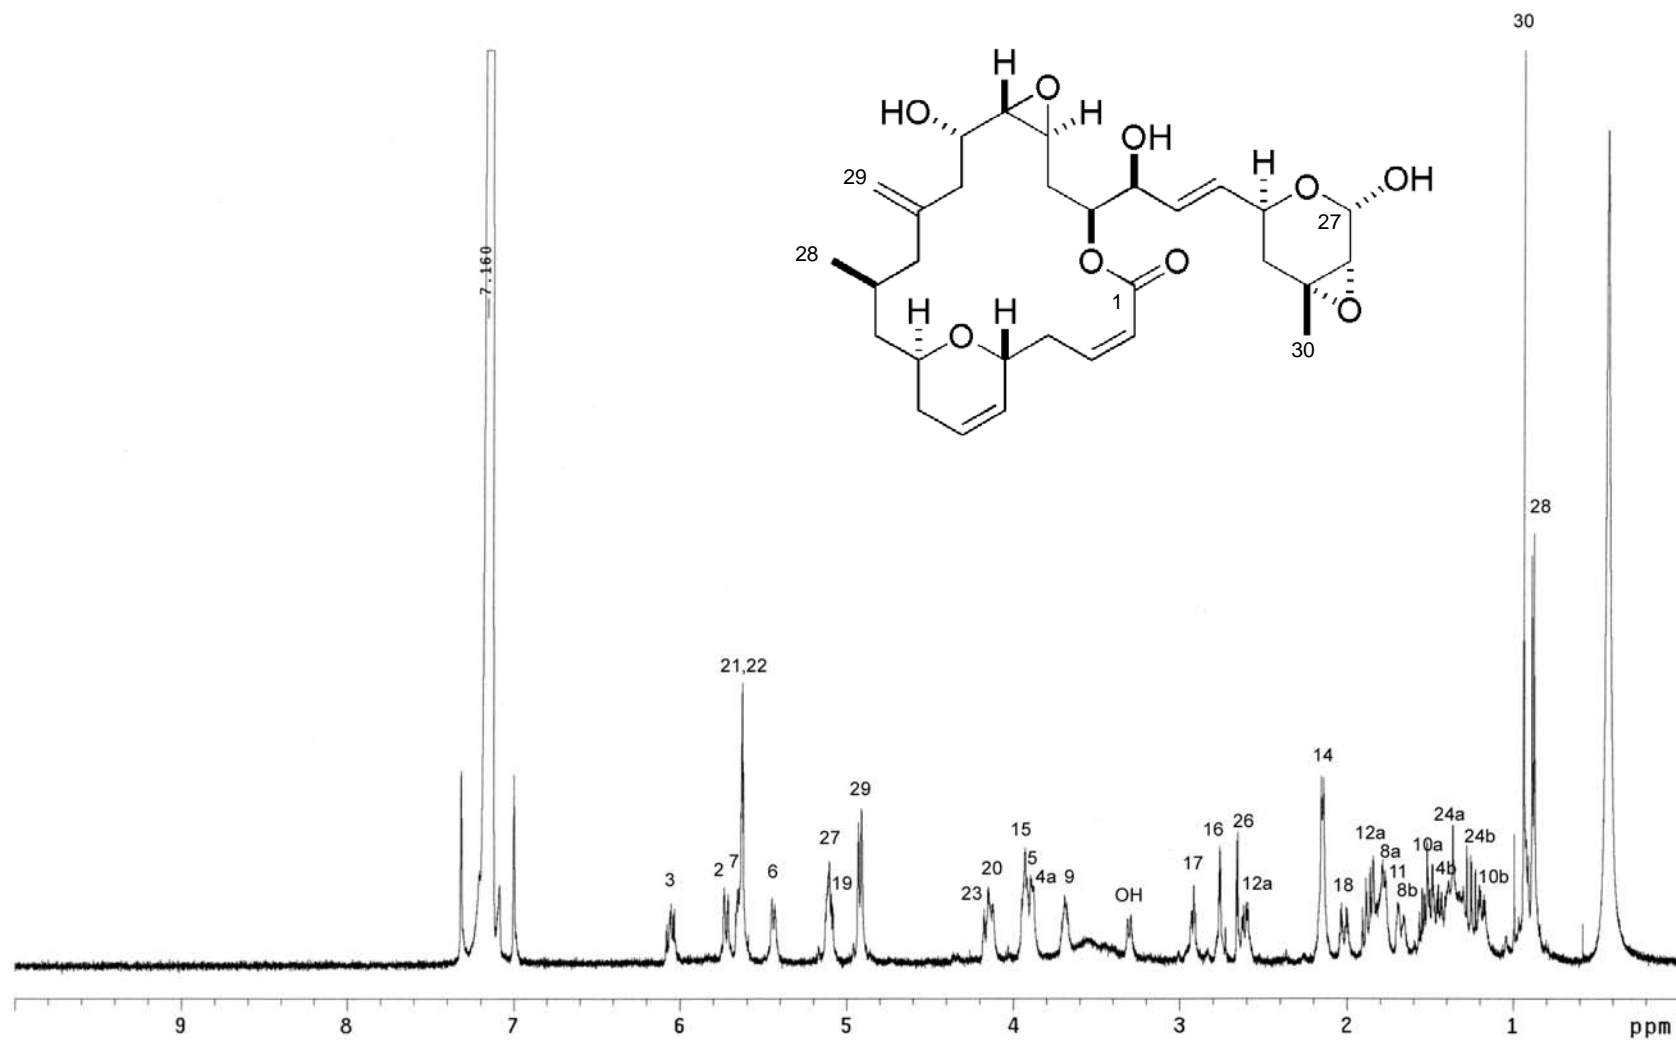

**Figure S13.**  $^{13}\text{C}$  NMR spectrum of fijianolide G (**10**), (125 MHz,  $\text{C}_6\text{D}_6$ )

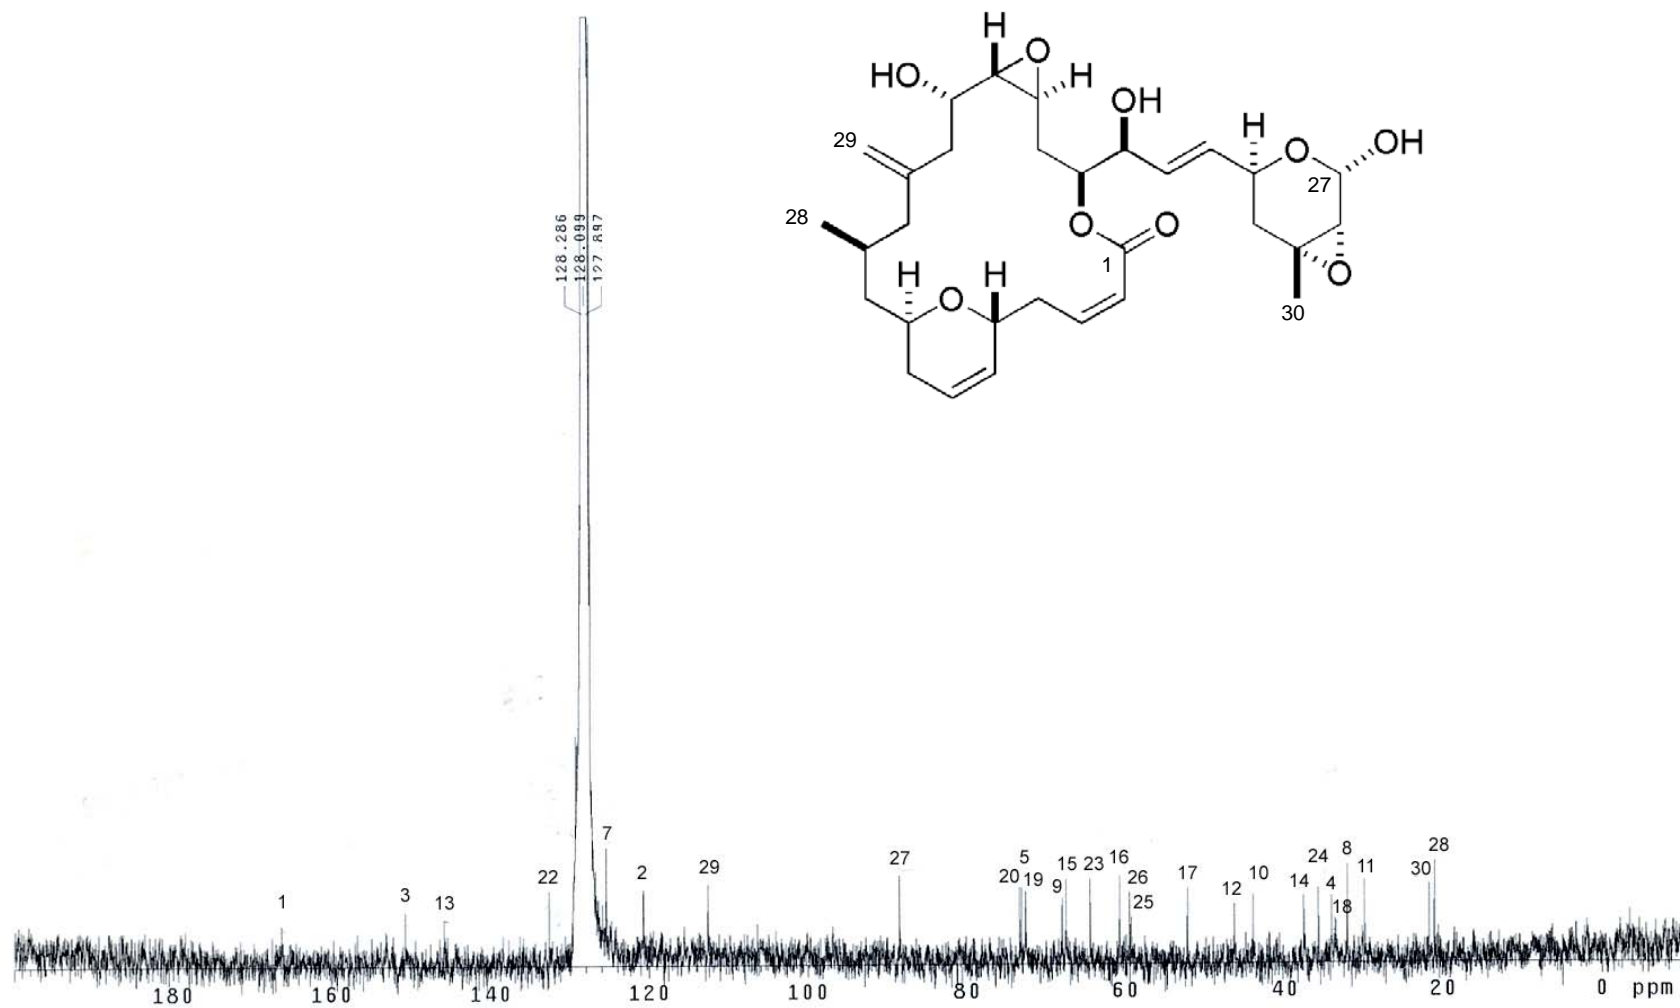

**Figure S14.**  $^1\text{H}$  NMR spectrum of fijianolide H (**11**), (500 MHz,  $\text{C}_6\text{D}_6$ )

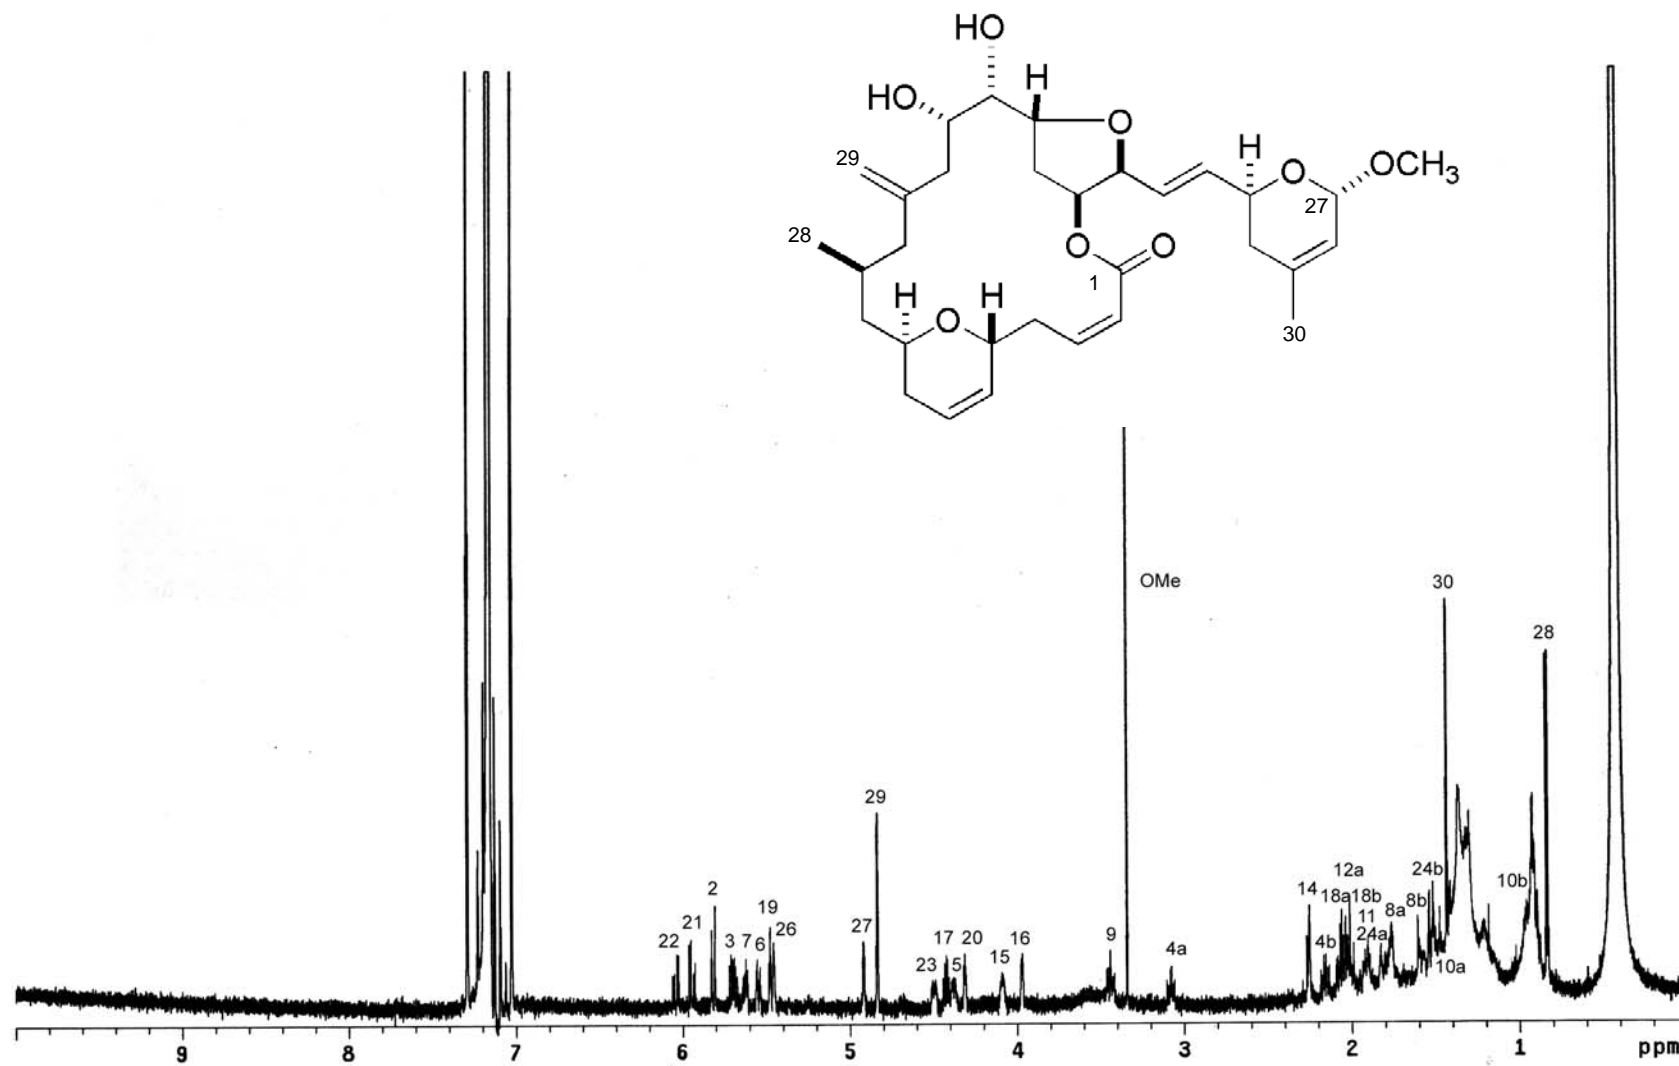

**Figure S15.**  $^{13}\text{C}$  NMR spectrum of fijianolide H (**11**), (125 MHz,  $\text{C}_6\text{D}_6$ )

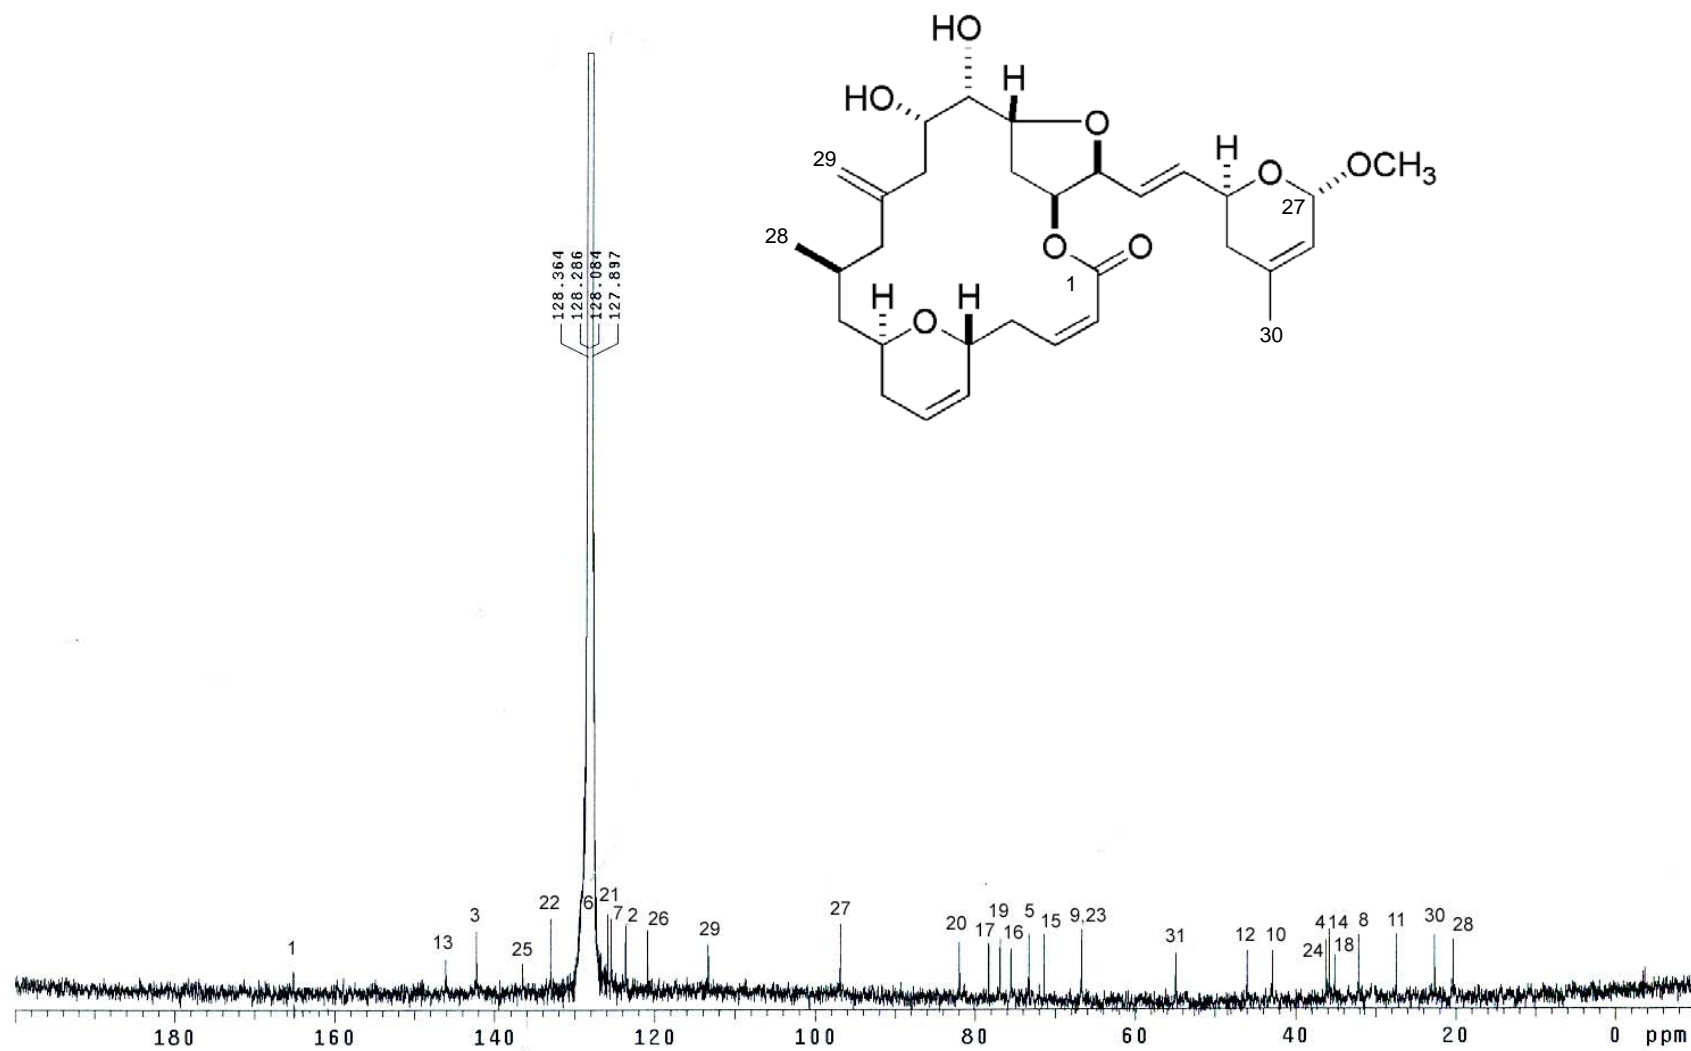

**Figure S16.**  $^1\text{H}$  NMR spectrum of fijianolide I (**12**), (500 MHz,  $\text{C}_6\text{D}_6$ )

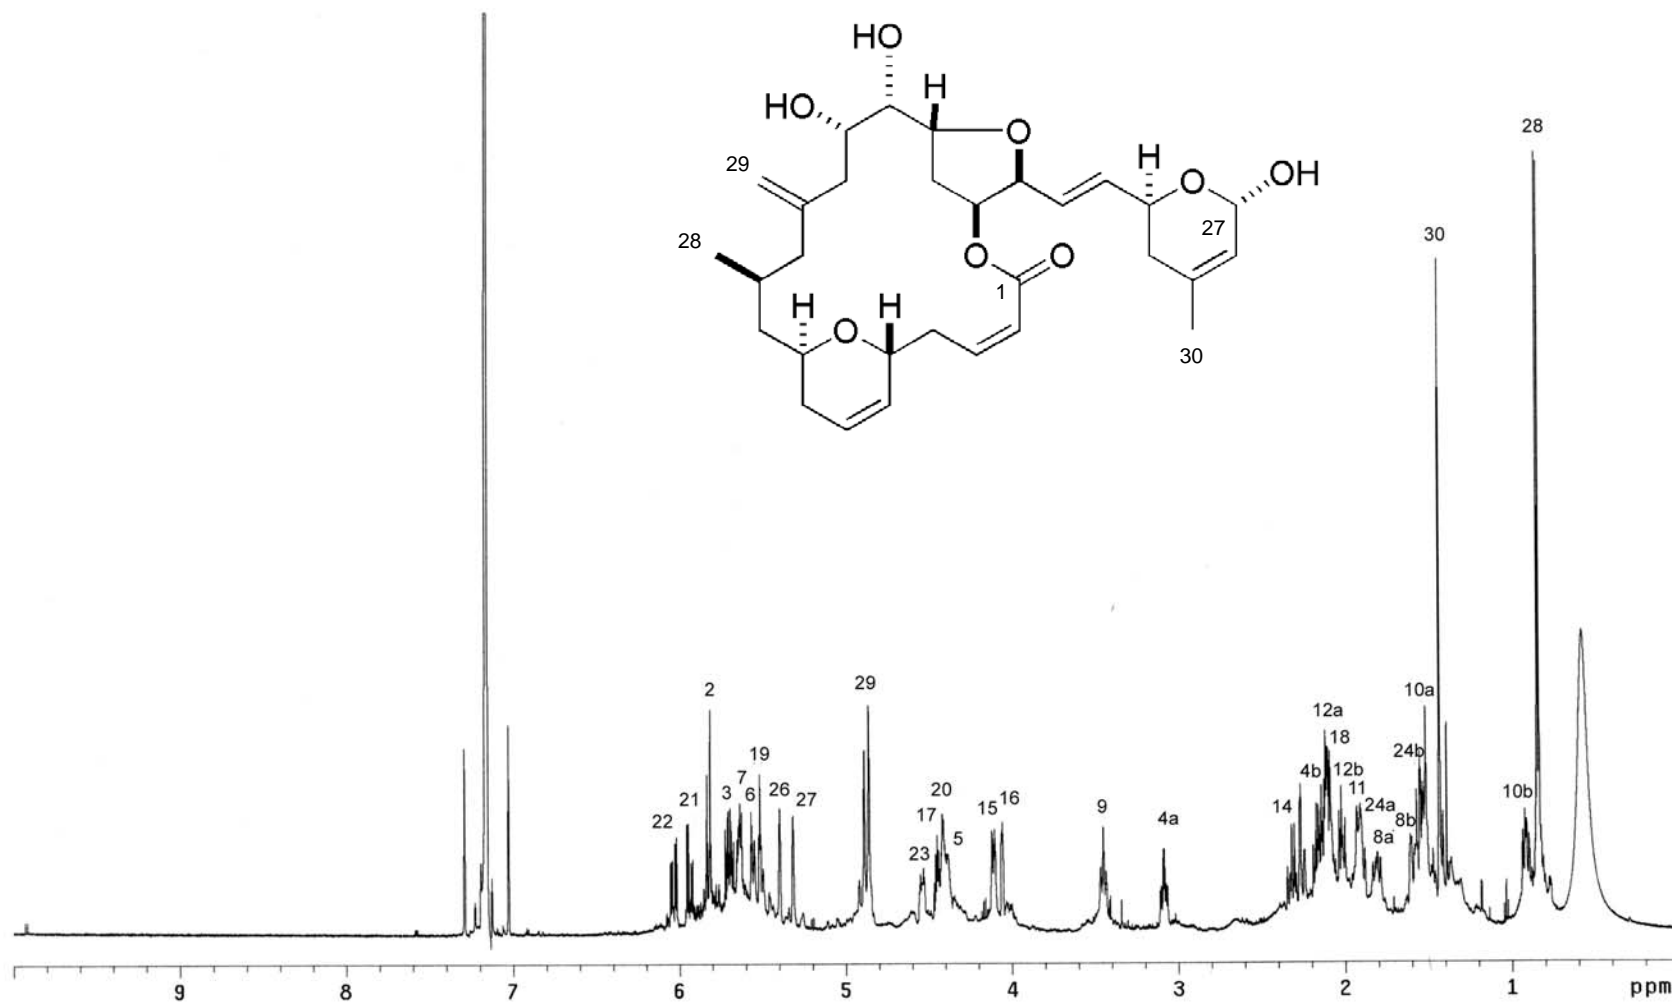

**Figure S17.**  $^{13}\text{C}$  NMR spectrum of fijianolide I (**12**), (125 MHz,  $\text{C}_6\text{D}_6$ )

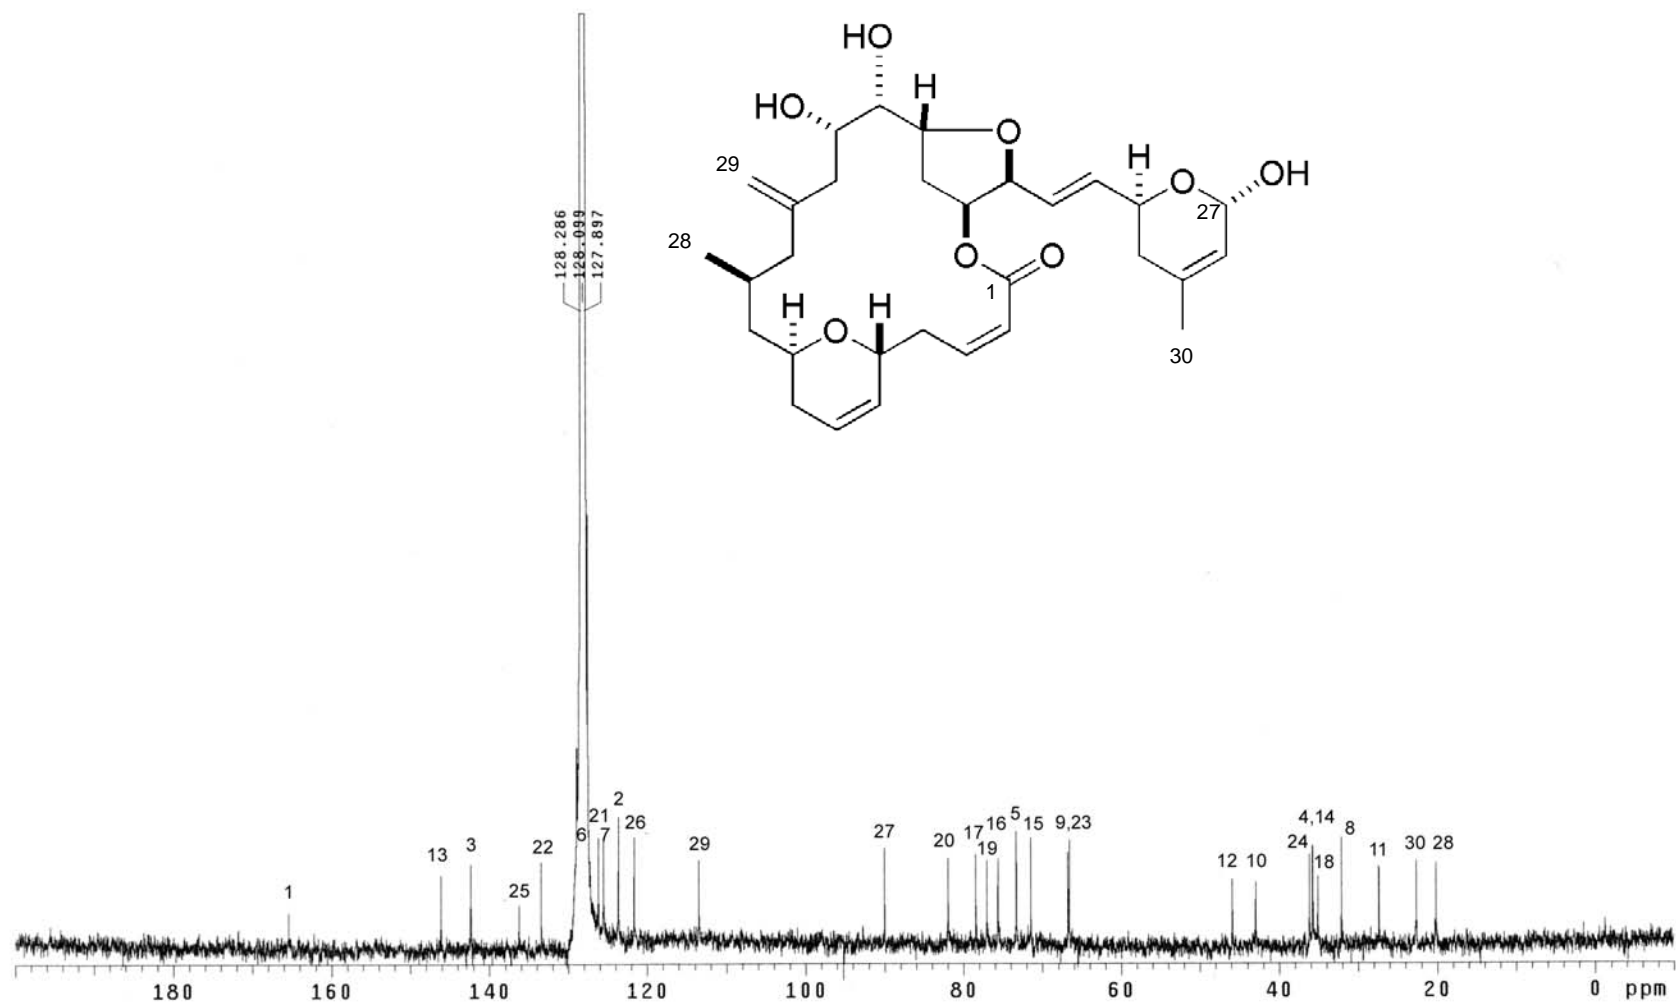

**Figure S18.** NOE enhancement of H-23 of **9** in benzene-*d*<sub>6</sub> at 600 MHz.

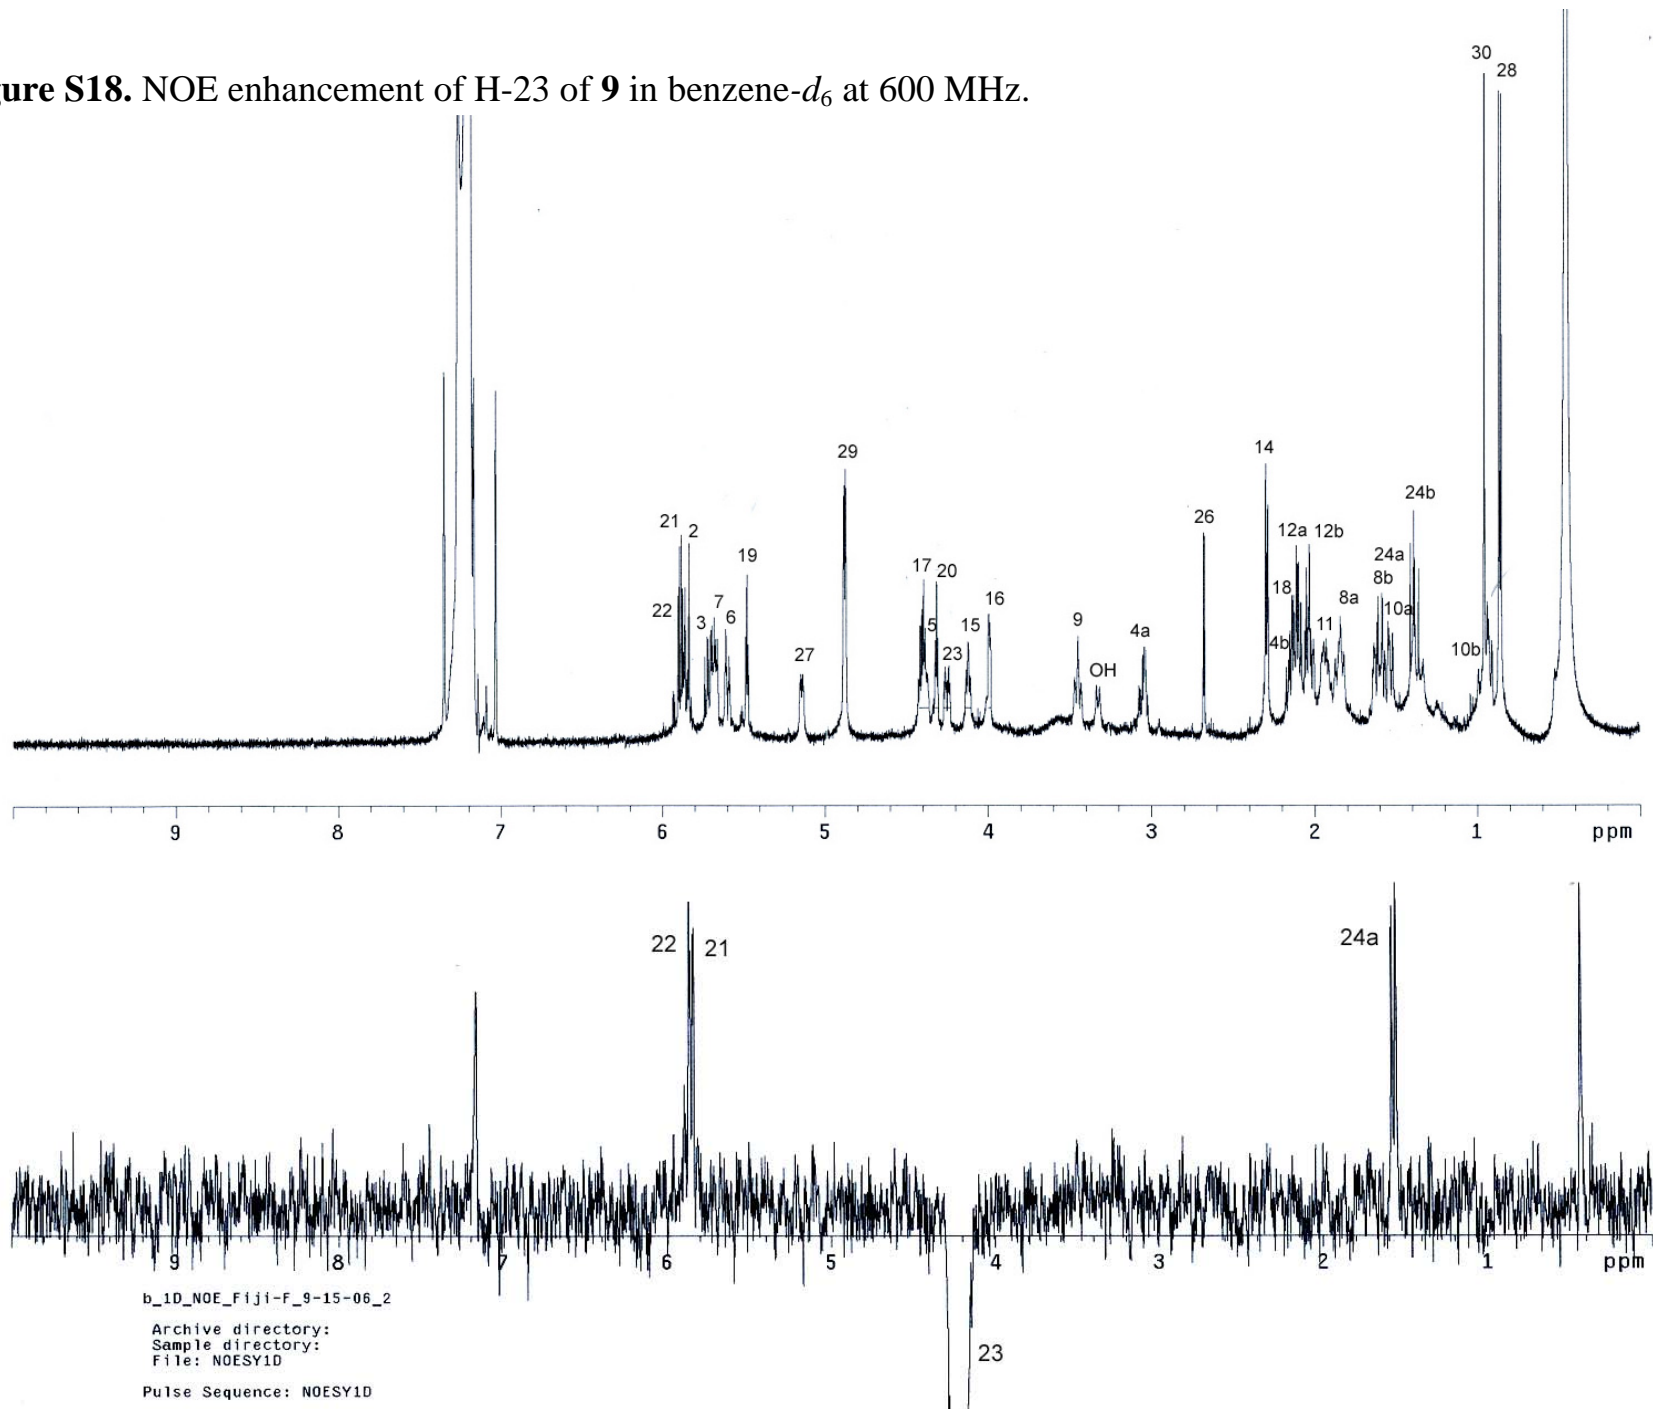



**Figure S19.** NOE enhancement of H-26 of **9** in benzene-*d*<sub>6</sub> at 600 MHz.

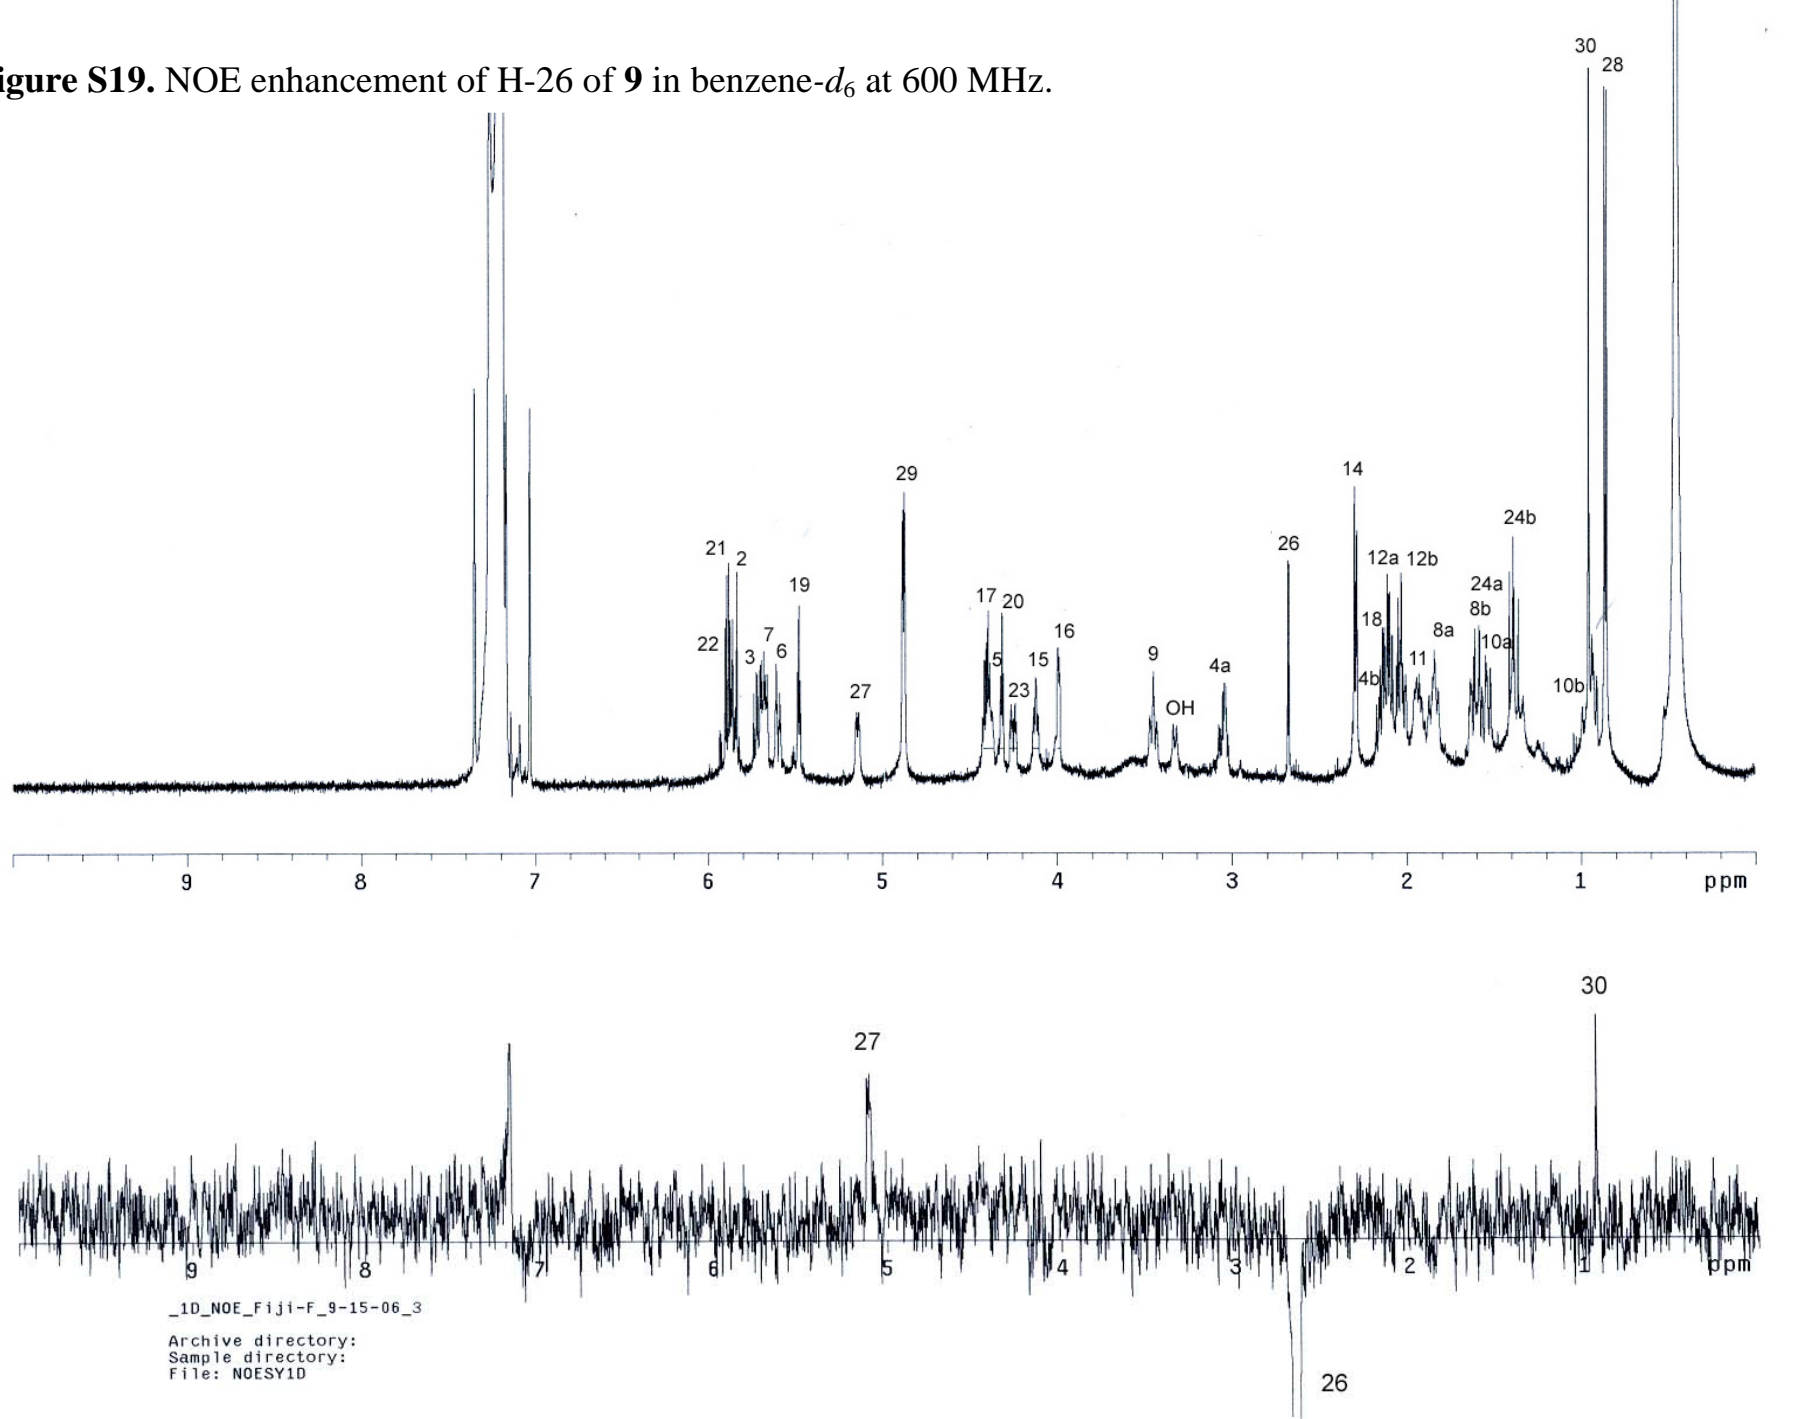

**Figure S20.** NOE enhancement of H-27 of **9** in benzene-*d*<sub>6</sub> at 600 MHz.

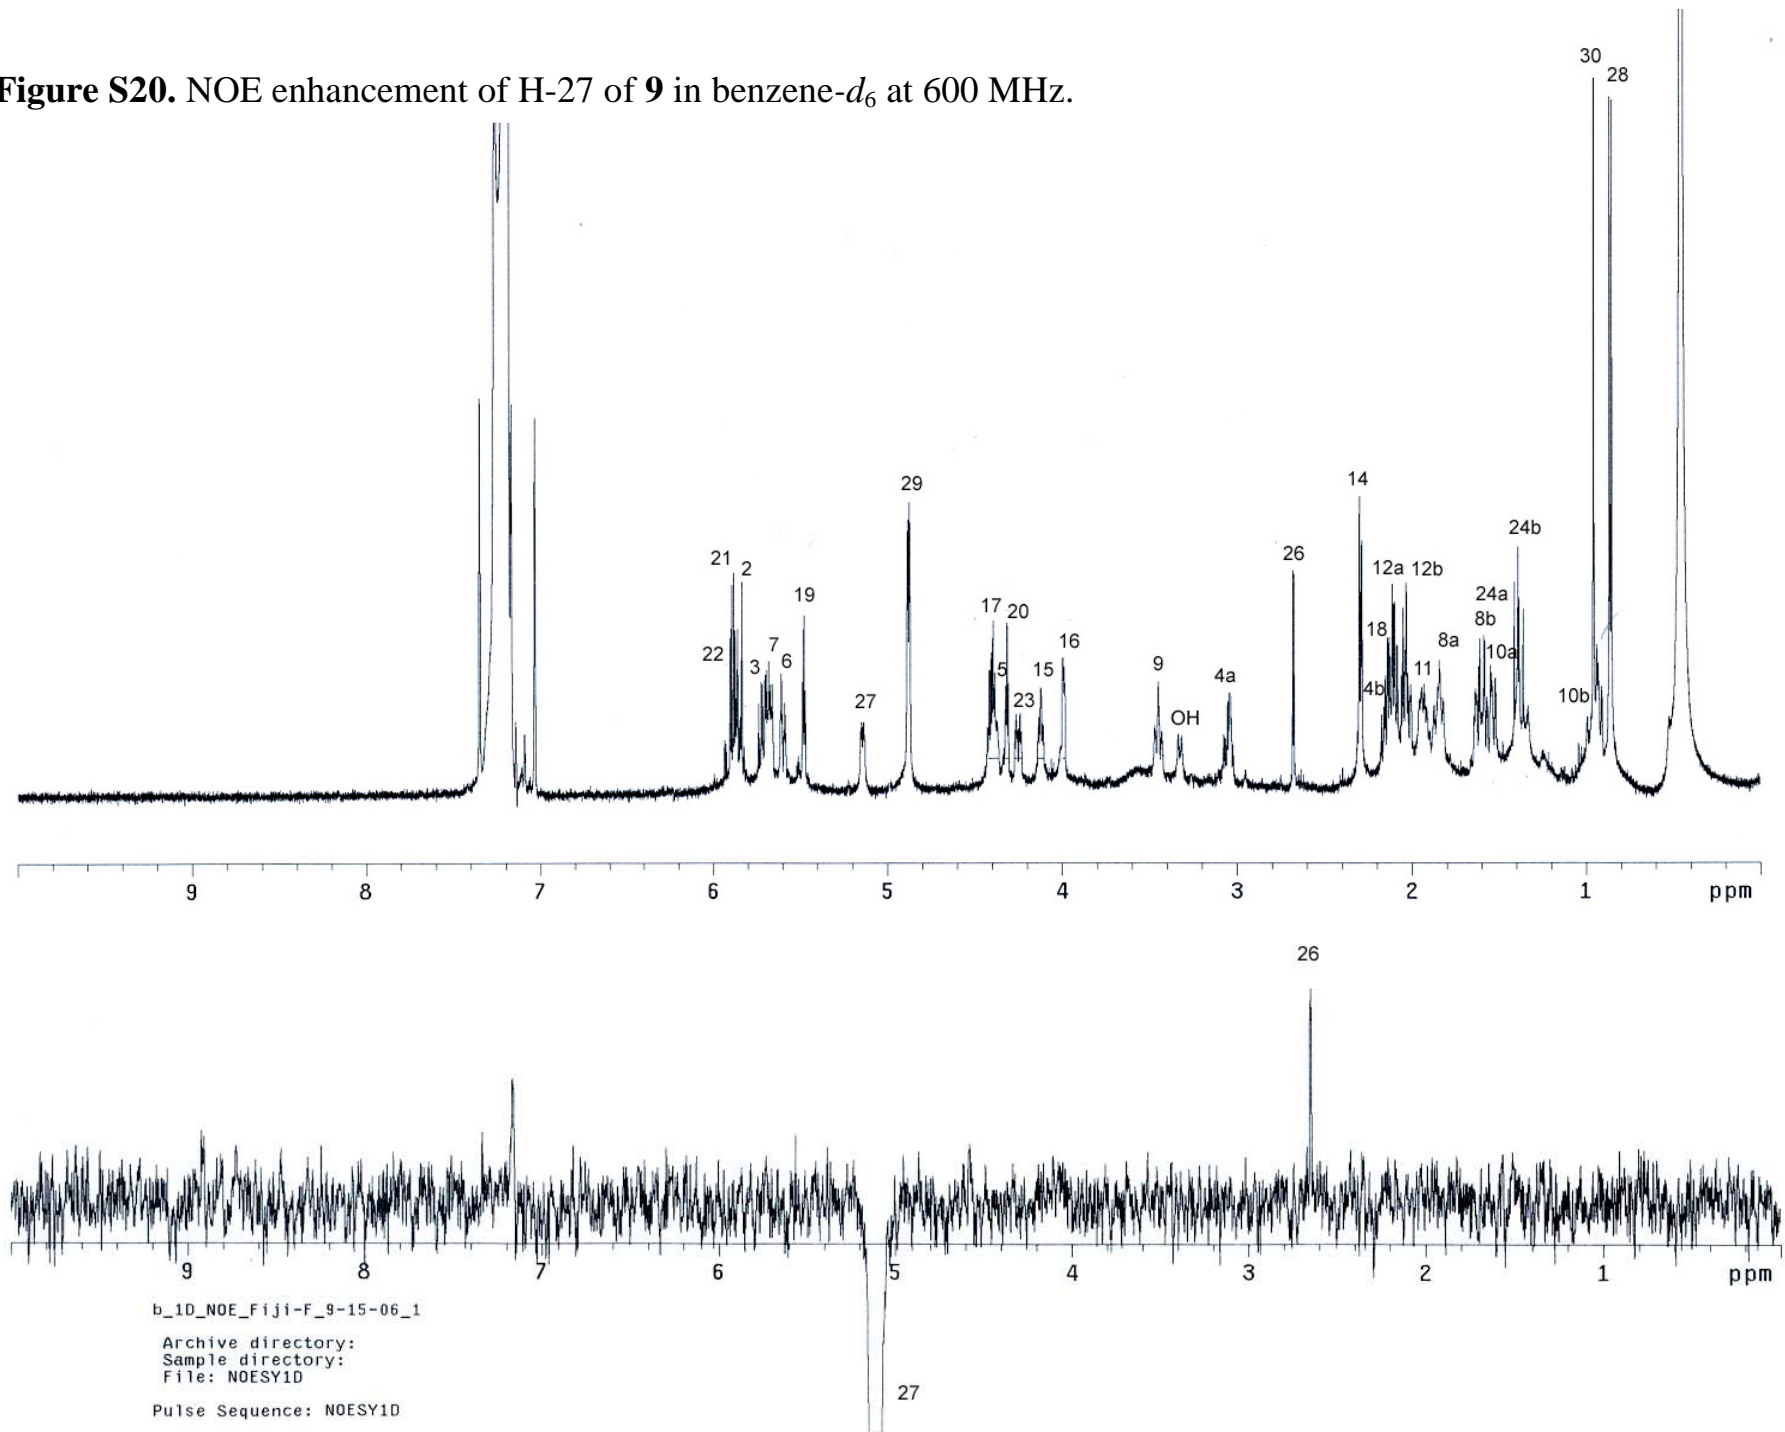

**Figure S21.** NOE enhancement of CH<sub>3</sub>-30 of **9** in benzene-*d*<sub>6</sub> at 600 MHz.

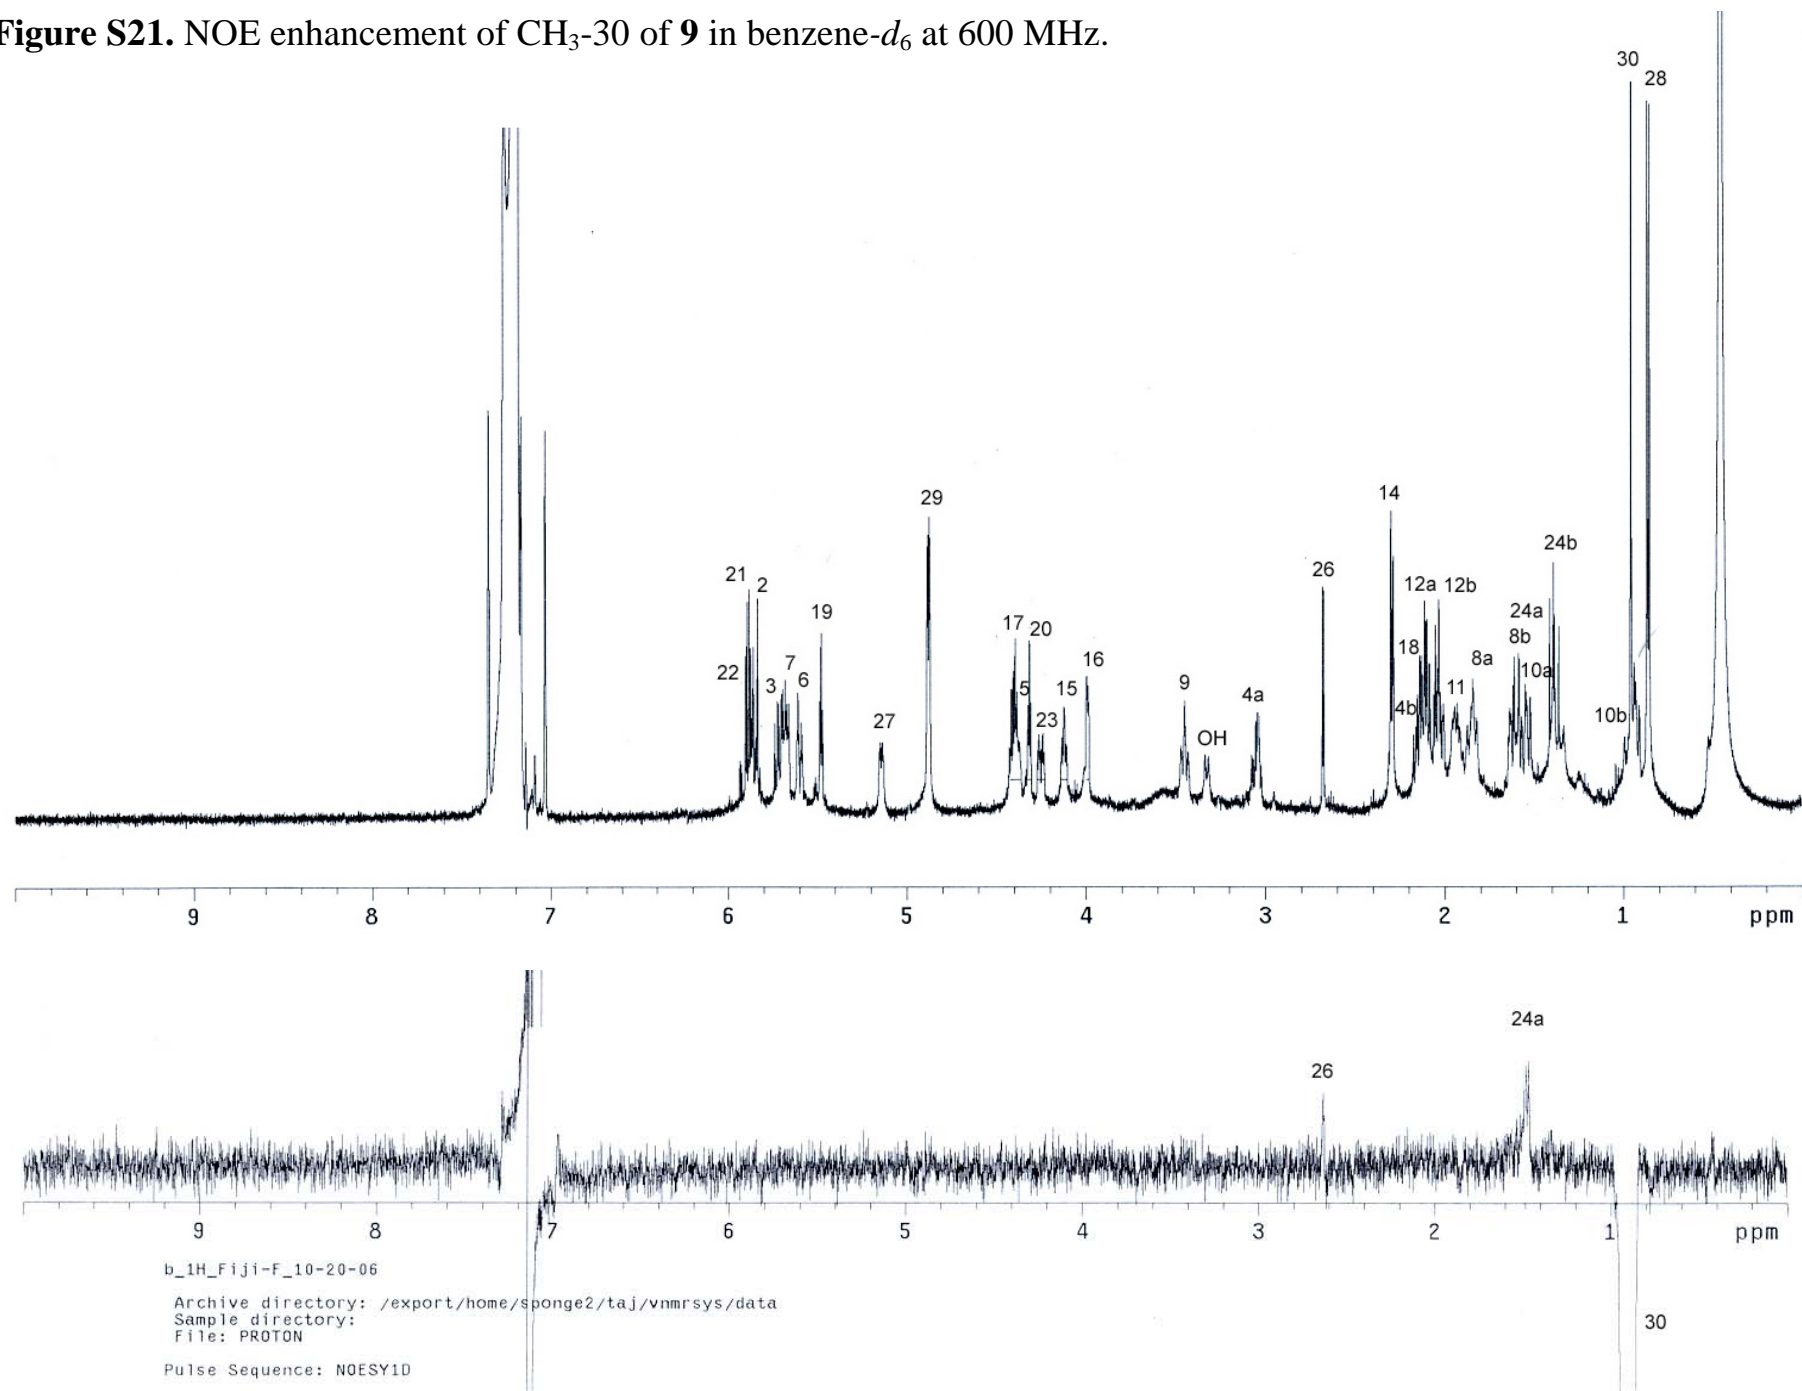

**Figure S22.** NOE enhancement of H-23 of **10** in benzene-*d*<sub>6</sub> at 600 MHz.

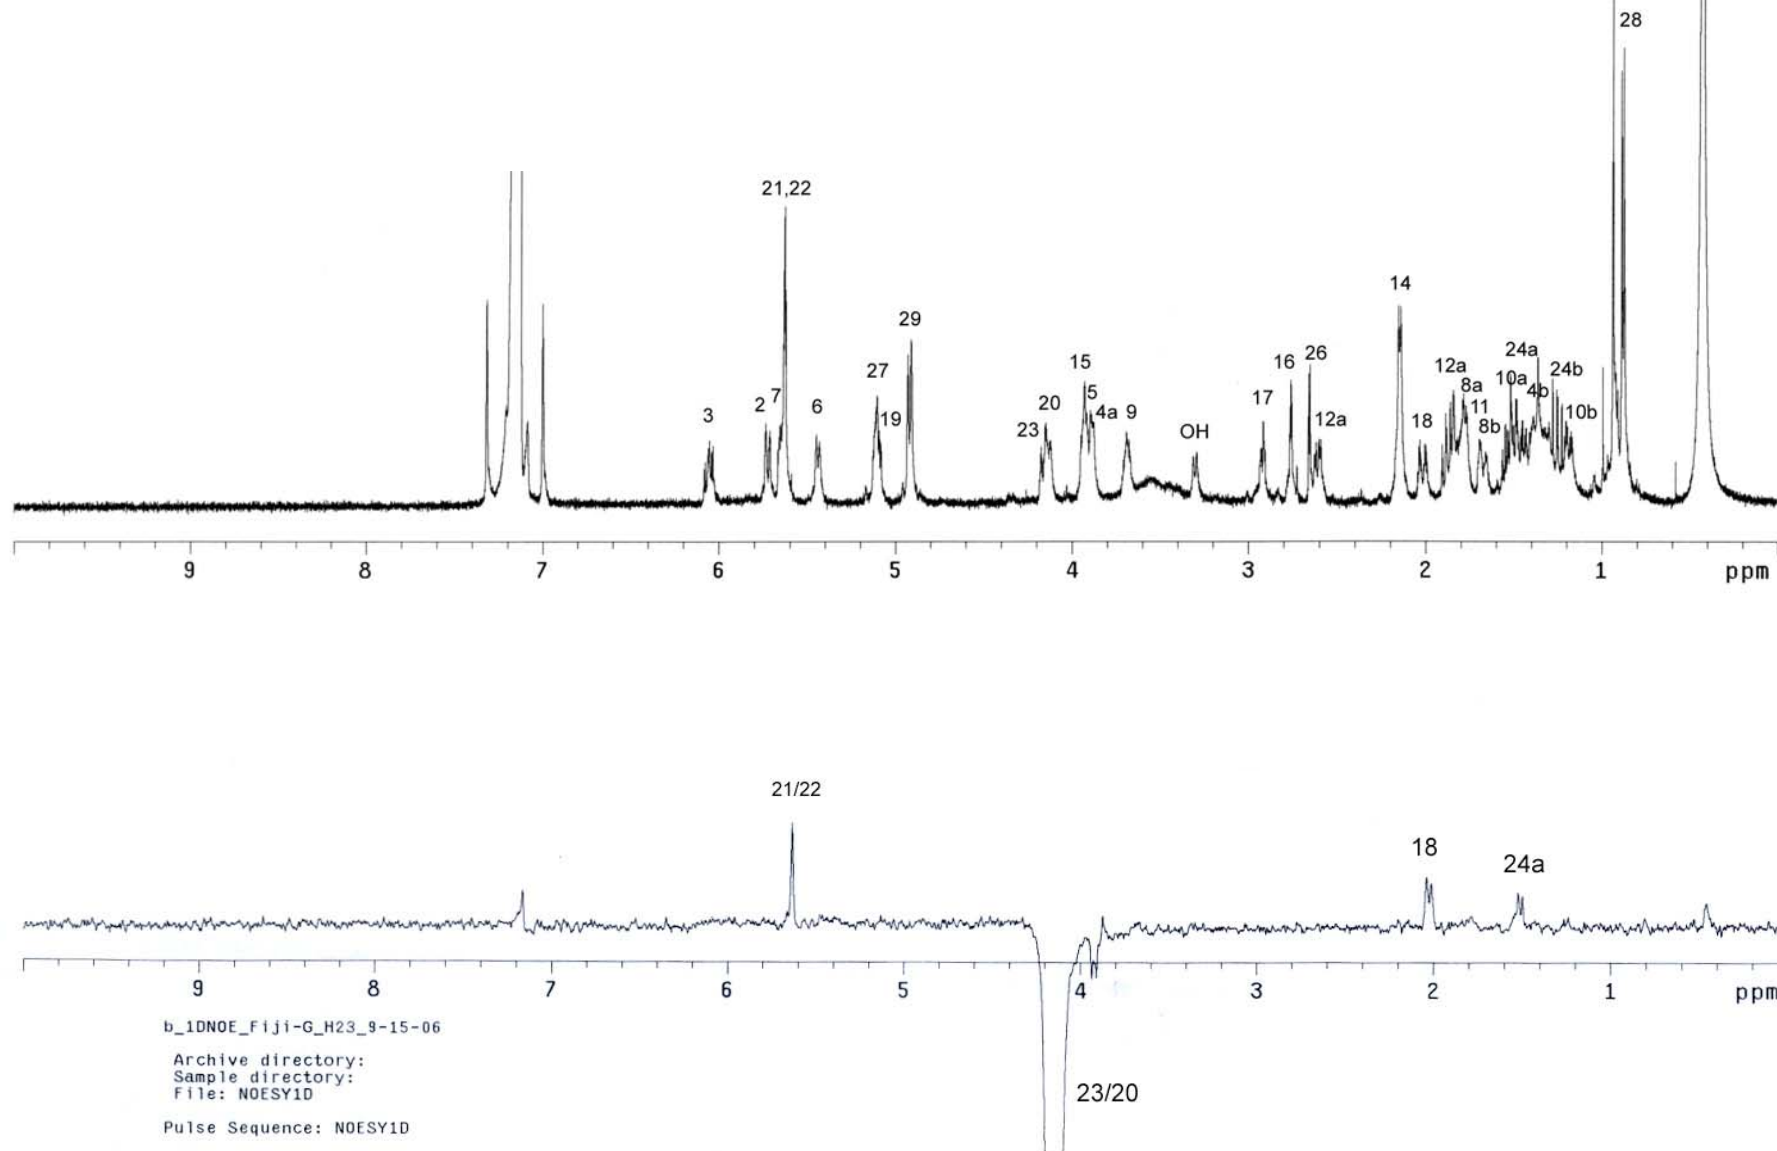

**Figure S23.** NOE enhancement of H-26 of **10** in benzene- $d_6$  at 600 MHz.

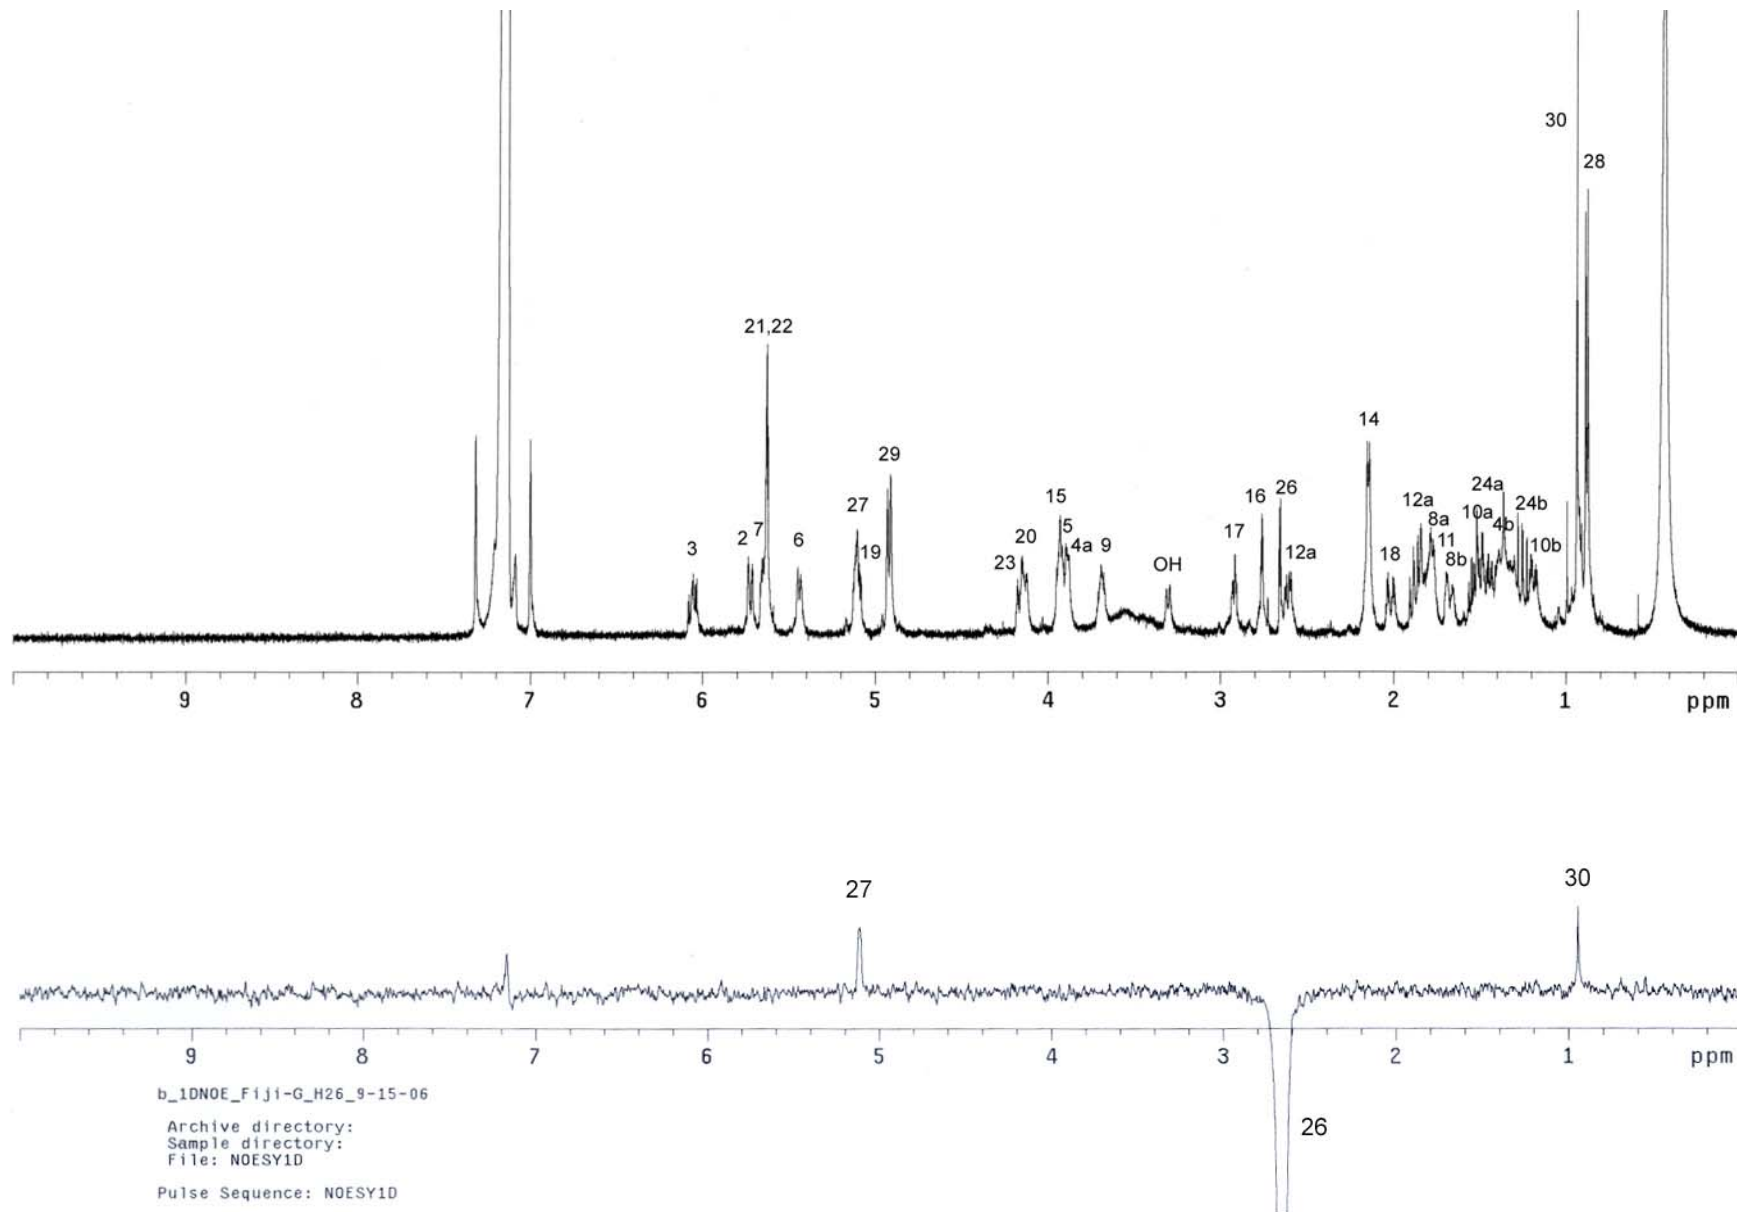

**Figure S24.** NOE enhancement of H-27 of **10** in benzene- $d_6$  at 600 MHz.

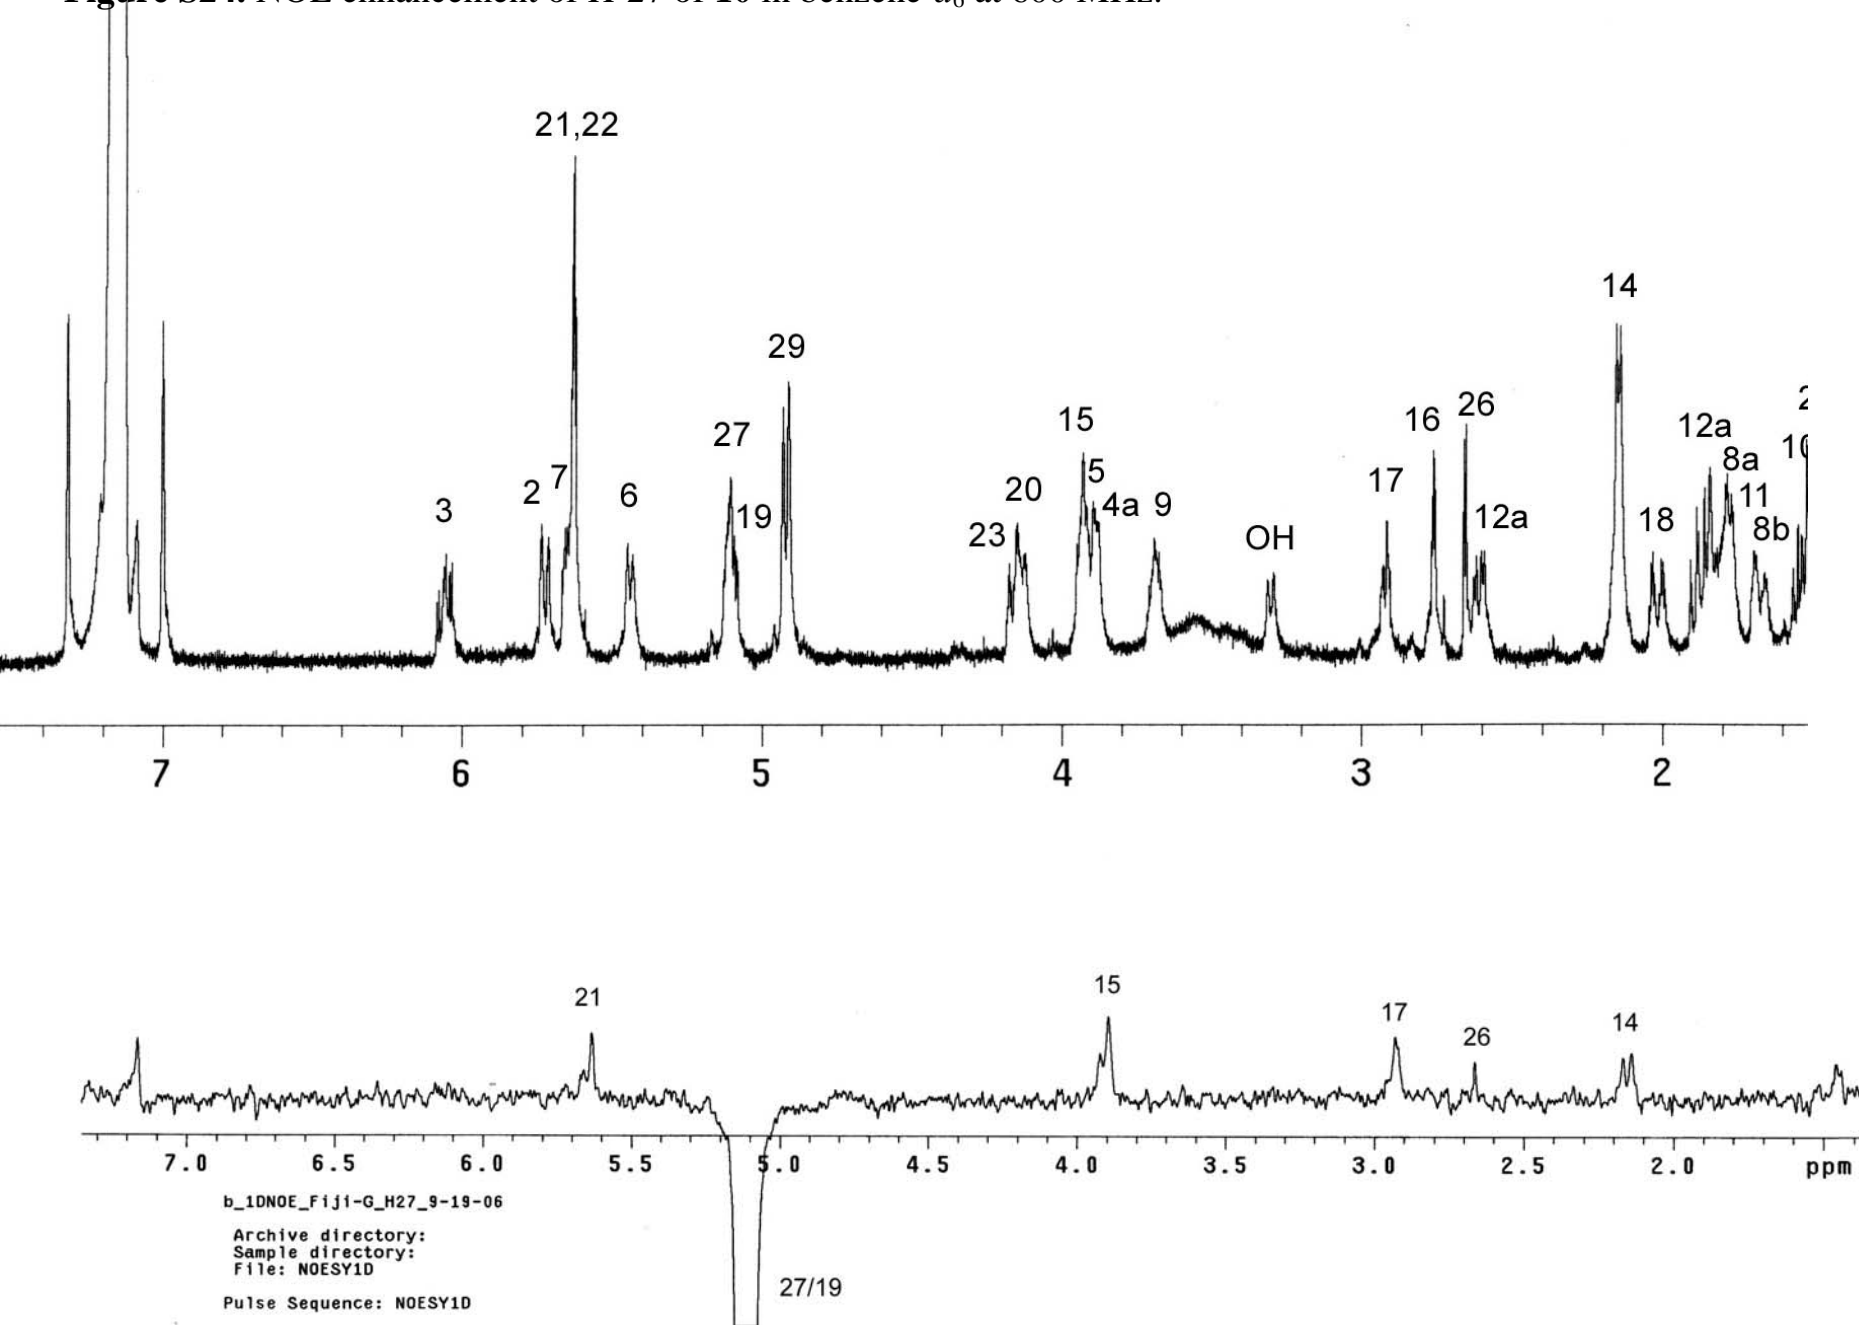

**Figure S25.** Gradient LCMS chromatogram of **1** using: 30:70 to 80:20 (50min) in CH<sub>3</sub>CN/H<sub>2</sub>O.

**Sample Information**

|                  |                |                   |                                |
|------------------|----------------|-------------------|--------------------------------|
| SampleName       | 02600 FD P7 F4 | Date Acquired     | 10/26/03 11:54:04 AM           |
| Injection        | 1              | Acq Method Set    | ELSD_stdgrad_30_70_80_20_50min |
| Injection Volume | 15.00 ul       | Processing Method | sponge@254                     |
| Run Time         | 60.0 Minutes   |                   |                                |
| Vial 1           |                |                   |                                |

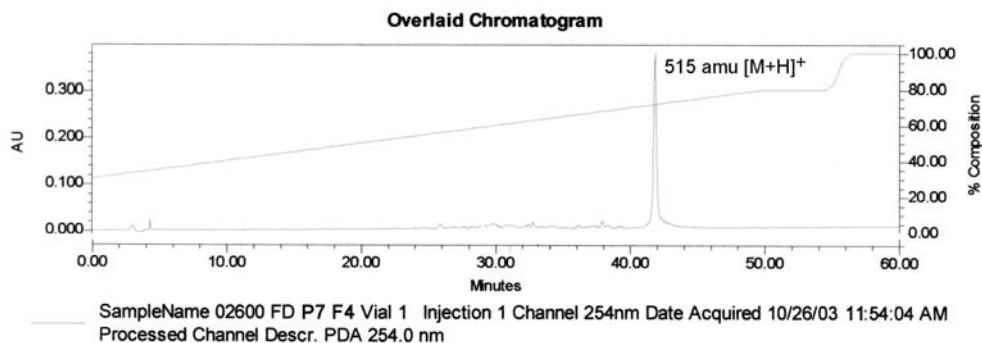

**Figure S26.** Gradient LCMS chromatogram of **2** using: 30:70 to 80:20 (50min) in CH<sub>3</sub>CN/H<sub>2</sub>O.

**Sample Information**

|                  |                |                   |                                |
|------------------|----------------|-------------------|--------------------------------|
| SampleName       | 02600 FD P5 F3 | Date Acquired     | 10/26/03 7:06:07 AM            |
| Injection        | 1              | Acq Method Set    | ELSD_stdgrad_30_70_80_20_50min |
| Injection Volume | 15.00 ul       | Processing Method | sponge@254                     |
| Run Time         | 60.0 Minutes   |                   |                                |
| Vial 15          |                |                   |                                |

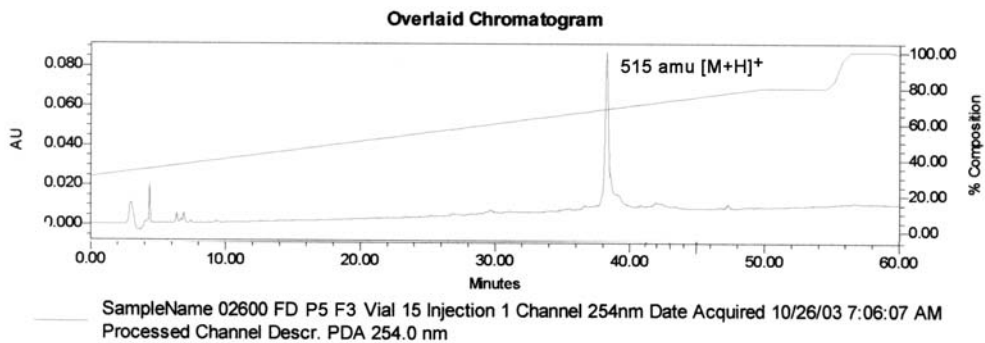

**Figure S27.** Gradient LCMS chromatogram of **7** using: 30:70 to 80:20 (50min) in CH<sub>3</sub>CN/H<sub>2</sub>O.

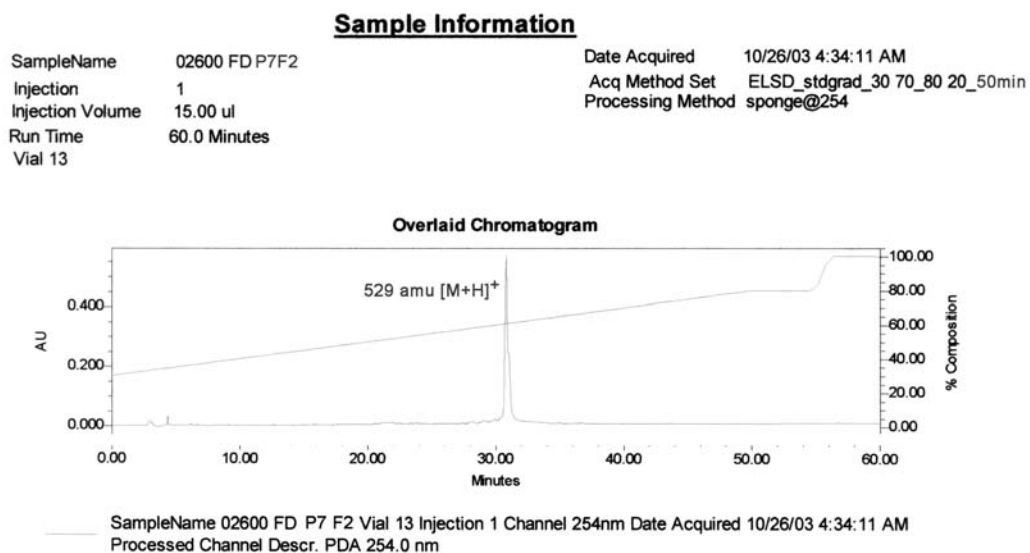

**Figure S28.** Gradient LCMS chromatogram of **8** using: 10:90 to 100 (50min) in CH<sub>3</sub>CN/H<sub>2</sub>O.

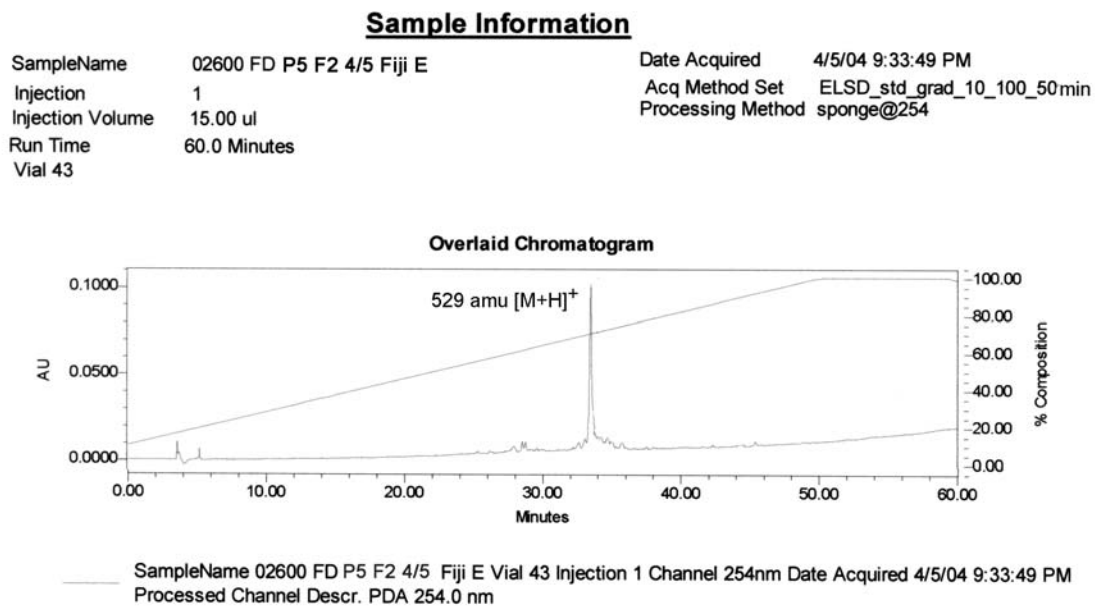



**Figure S29.** Gradient LCMS chromatogram of **9** using: 30:70 to 80:20 (50min) in CH<sub>3</sub>CN/H<sub>2</sub>O.

**Sample Information**

|                  |                |                   |                                |
|------------------|----------------|-------------------|--------------------------------|
| SampleName       | 02600 FD P7 F1 | Date Acquired     | 10/26/03 1:46:12 AM            |
| Injection        | 1              | Acq Method Set    | ELSD_stdgrad_30_70_80_20_50min |
| Injection Volume | 15.00 ul       | Processing Method | sponge@254                     |
| Run Time         | 60.0 Minutes   |                   |                                |
| Vial 10          |                |                   |                                |

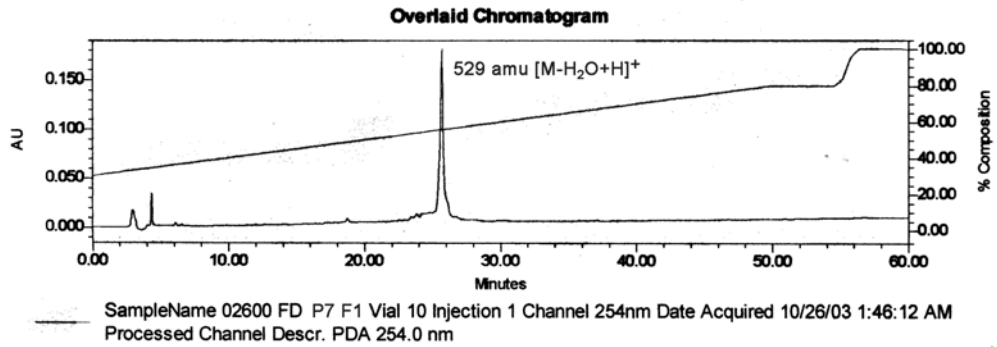

**Figure S30.** Gradient LCMS chromatogram of **10** using: 30:70 to 80:20 (50min) in CH<sub>3</sub>CN/H<sub>2</sub>O.

**Sample Information**

|                  |                |                   |                                |
|------------------|----------------|-------------------|--------------------------------|
| SampleName       | 02600 FD P5 F1 | Date Acquired     | 10/26/03 3:18:11 AM            |
| Injection        | 1              | Acq Method Set    | ELSD_stdgrad_30_70_80_20_50min |
| Injection Volume | 15.00 ul       | Processing Method | sponge@254                     |
| Run Time         | 60.0 Minutes   |                   |                                |
| Vial 12          |                |                   |                                |

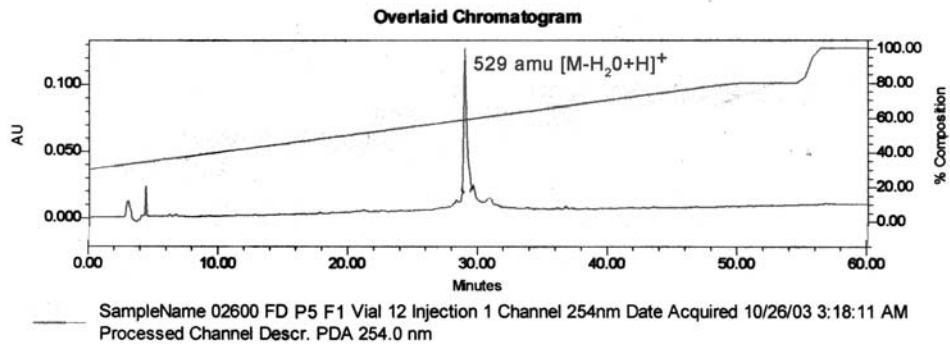

**Figure S31.** Gradient LCMS chromatogram of **11** using: 30:70 to 80:20 (50min) in CH<sub>3</sub>CN/H<sub>2</sub>O.

**Sample Information**

|                  |               |                   |                                |
|------------------|---------------|-------------------|--------------------------------|
| SampleName       | 02600FDP7F3F1 | Date Acquired     | 10/26/03 8:22:07 AM            |
| Injection        | 1             | Acq Method Set    | ELSD_stdgrad_30_70_80_20_50min |
| Injection Volume | 15.00 ul      | Processing Method | sponge@254                     |
| Run Time         | 60.0 Minutes  |                   |                                |
| Vial 16          |               |                   |                                |

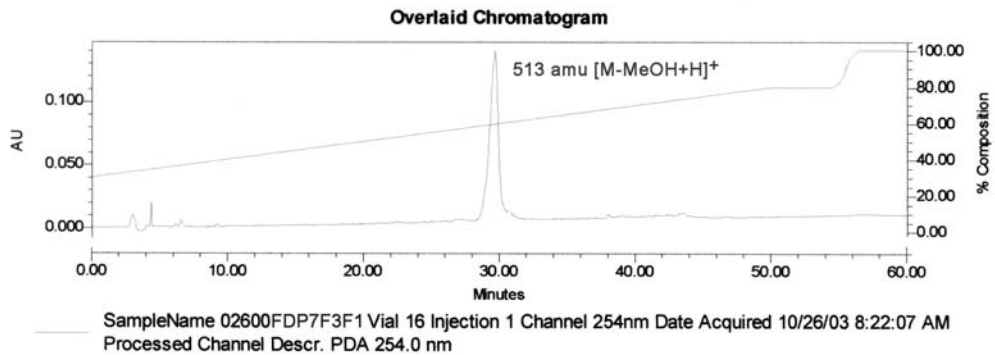

**Figure S32.** Gradient LCMS chromatogram of **12** using: 30:70 to 80:20 (50min) in CH<sub>3</sub>CN/H<sub>2</sub>O.

**Sample Information**

|                  |               |                   |                                |
|------------------|---------------|-------------------|--------------------------------|
| SampleName       | 02600FDP7F3F2 | Date Acquired     | 10/26/03 10:54:04 AM           |
| Injection        | 1             | Acq Method Set    | ELSD_stdgrad_30_70_80_20_50min |
| Injection Volume | 15.00 ul      | Processing Method | sponge@254                     |
| Run Time         | 60.0 Minutes  |                   |                                |
| Vial 18          |               |                   |                                |

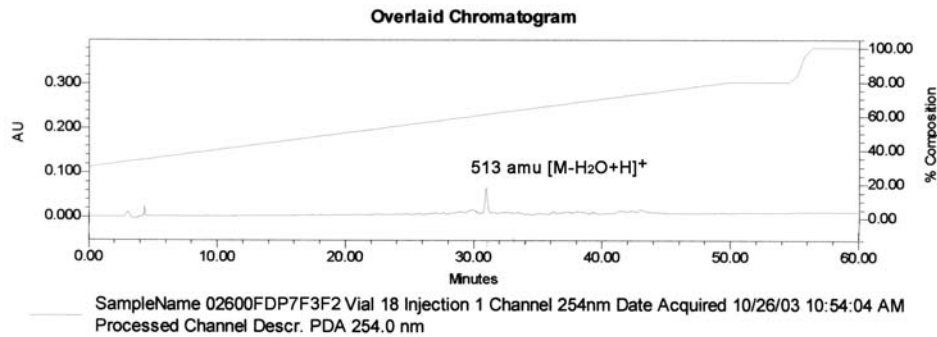

Supplement: NIHMS62579-supplement-1si20070524_05.pdf [file NIHMS62579-supplement-1si20070524_05.pdf]
